# Supplementary material
Source: PubMed Central journal article supplement (PMC5555435)

## Supplementary Tables

Supplementary Table 1: Differentially expressed miRNAs between *F nucleatum*-treated and untreated cells.

| miRNA           | p-value  | FDR      | Log2<br>(FC) | Untreated |       |       |       | <i>F nucleatum</i> -treated |       |       |       |
|-----------------|----------|----------|--------------|-----------|-------|-------|-------|-----------------------------|-------|-------|-------|
|                 |          |          |              | HCT116    | HT29  | LoVo  | SW480 | HCT116                      | HT29  | LoVo  | SW480 |
| hsa-miR-4773    | 6.02E-05 | 6.14E-03 | -10.98       | 5         | 12    | 10    | 49    | 0                           | 0     | 0     | 0     |
| hsa-let-7f-5p   | 1.03E-04 | 5.24E-03 | 2.67         | 1,103     | 1,243 | 1,012 | 1,599 | 8,825                       | 8,608 | 5,168 | 8,872 |
| hsa-let-7i-5p   | 2.94E-04 | 9.99E-03 | 3.65         | 102       | 257   | 113   | 140   | 2,466                       | 2,096 | 1,022 | 2,103 |
| hsa-miR-23a-3p  | 4.77E-04 | 1.22E-02 | 2.74         | 665       | 1,226 | 670   | 1,182 | 7,751                       | 6,887 | 3,722 | 6,620 |
| hsa-let-7a-5p   | 5.56E-04 | 1.13E-02 | 2.60         | 798       | 1,428 | 862   | 1,336 | 8,192                       | 7,414 | 3,821 | 7,430 |
| hsa-miR-6837-3p | 5.90E-04 | 1.00E-02 | -10.41       | 8         | 35    | 2     | 4     | 0                           | 0     | 0     | 0     |
| hsa-miR-6837-5p | 7.34E-04 | 1.07E-02 | -12.27       | 6         | 28    | 143   | 6     | 0                           | 0     | 0     | 0     |
| hsa-miR-23b-3p  | 7.40E-04 | 9.44E-03 | 2.79         | 579       | 1,205 | 616   | 935   | 6,968                       | 6,551 | 3,040 | 6,457 |
| hsa-miR-21-5p   | 7.90E-04 | 8.95E-03 | 2.12         | 1,495     | 1,696 | 1,514 | 2,085 | 8,978                       | 8,173 | 4,804 | 7,552 |

| miRNA           | p-value  | FDR      | Log2<br>(FC) | Untreated       |          |          |       | <i>F. nucleatum</i> -treated |        |       |        |
|-----------------|----------|----------|--------------|-----------------|----------|----------|-------|------------------------------|--------|-------|--------|
|                 |          |          |              | HCT116          | HT29     | LoVo     | SW480 | HCT116                       | HT29   | LoVo  | SW480  |
|                 |          |          |              | hsa-miR-24-2-5p | 8.86E-04 | 9.04E-03 | 3.17  | 9                            | 12     | 10    | 19     |
| hsa-miR-27b-3p  | 1.53E-03 | 1.42E-02 | 3.29         | 64              | 162      | 78       | 96    | 1,261                        | 1,199  | 363   | 1,086  |
| hsa-miR-31-3p   | 1.79E-03 | 1.52E-02 | 5.49         | 2               | 8        | 1        | 7     | 362                          | 191    | 48    | 190    |
| hsa-miR-24-3p   | 2.10E-03 | 1.65E-02 | 2.31         | 1,554           | 2,844    | 1,145    | 2,560 | 11,217                       | 11,249 | 7,577 | 10,002 |
| hsa-let-7b-5p   | 2.36E-03 | 1.72E-02 | 3.70         | 76              | 279      | 69       | 86    | 2,386                        | 2,593  | 733   | 924    |
| hsa-miR-27a-3p  | 3.19E-03 | 2.17E-02 | 2.61         | 131             | 374      | 145      | 207   | 1,529                        | 1,827  | 591   | 1,285  |
| hsa-miR-34a-5p  | 3.23E-03 | 2.06E-02 | 4.50         | 4               | 6        | 4        | 4     | 197                          | 84     | 50    | 50     |
| hsa-miR-30a-5p  | 3.79E-03 | 2.27E-02 | 1.11         | 1,957           | 1,575    | 2,233    | 1,388 | 4,709                        | 3,846  | 2,831 | 4,025  |
| hsa-miR-4789-3p | 3.91E-03 | 2.21E-02 | -9.20        | 63              | 7        | 115      | 2     | 0                            | 0      | 0     | 0      |
| hsa-miR-99a-5p  | 4.04E-03 | 2.17E-02 | 1.88         | 248             | 236      | 245      | 125   | 799                          | 1,121  | 438   | 788    |
| hsa-miR-4306    | 4.55E-03 | 2.32E-02 | -2.17        | 285             | 765      | 394      | 474   | 95                           | 97     | 178   | 57     |

| miRNA             | p-value  | FDR      | Log2<br>(FC) | Untreated      |          |          |       | <i>F. nucleatum</i> -treated |       |      |       |
|-------------------|----------|----------|--------------|----------------|----------|----------|-------|------------------------------|-------|------|-------|
|                   |          |          |              | HCT116         | HT29     | LoVo     | SW480 | HCT116                       | HT29  | LoVo | SW480 |
|                   |          |          |              | hsa-miR-221-3p | 4.99E-03 | 2.42E-02 | 4.81  | 6                            | 80    | 12   | 6     |
| hsa-miR-22-3p     | 5.25E-03 | 2.44E-02 | 1.82         | 231            | 437      | 240      | 329   | 1,462                        | 943   | 577  | 1,373 |
| hsa-miR-7977      | 5.44E-03 | 2.41E-02 | -1.01        | 982            | 1,333    | 835      | 779   | 393                          | 471   | 596  | 493   |
| hsa-miR-19a-3p    | 5.56E-03 | 2.36E-02 | -2.42        | 772            | 1,939    | 1,073    | 623   | 95                           | 242   | 317  | 171   |
| hsa-miR-125b-5p   | 5.78E-03 | 2.36E-02 | 2.80         | 179            | 127      | 117      | 152   | 1,588                        | 671   | 554  | 1,203 |
| hsa-miR-378f      | 6.20E-03 | 2.43E-02 | -1.87        | 584            | 371      | 385      | 259   | 102                          | 64    | 196  | 75    |
| hsa-miR-22-5p     | 6.63E-03 | 2.51E-02 | 1.80         | 9              | 21       | 11       | 17    | 86                           | 42    | 34   | 44    |
| hsa-miR-181a-2-3p | 6.64E-03 | 2.42E-02 | 1.78         | 6              | 5        | 12       | 4     | 37                           | 21    | 18   | 17    |
| hsa-miR-98-5p     | 6.81E-03 | 2.40E-02 | 3.39         | 36             | 163      | 70       | 32    | 597                          | 1,554 | 245  | 755   |
| hsa-miR-31-5p     | 6.95E-03 | 2.36E-02 | 5.67         | 3              | 114      | 15       | 6     | 3,289                        | 963   | 465  | 2,294 |
| hsa-miR-23c       | 7.57E-03 | 2.49E-02 | 3.38         | 68             | 234      | 82       | 84    | 1,238                        | 1,654 | 265  | 1,718 |

| miRNA           | p-value  | FDR      | Log2<br>(FC) | Untreated    |          |          |       | <i>F. nucleatum</i> -treated |       |      |       |
|-----------------|----------|----------|--------------|--------------|----------|----------|-------|------------------------------|-------|------|-------|
|                 |          |          |              | HCT116       | HT29     | LoVo     | SW480 | HCT116                       | HT29  | LoVo | SW480 |
|                 |          |          |              | hsa-miR-4324 | 7.72E-03 | 2.46E-02 | 2.38  | 125                          | 186   | 114  | 72    |
| hsa-miR-196a-5p | 7.92E-03 | 2.45E-02 | 2.40         | 98           | 37       | 95       | 25    | 490                          | 338   | 169  | 338   |
| hsa-miR-100-5p  | 8.31E-03 | 2.49E-02 | 3.09         | 100          | 229      | 168      | 52    | 1,719                        | 1,309 | 319  | 1,326 |
| hsa-miR-125a-5p | 8.68E-03 | 2.53E-02 | 0.93         | 398          | 262      | 336      | 238   | 678                          | 500   | 536  | 635   |
| hsa-miR-320a    | 9.25E-03 | 2.62E-02 | 0.60         | 414          | 305      | 343      | 434   | 668                          | 558   | 556  | 494   |
| hsa-miR-4454    | 1.02E-02 | 2.82E-02 | -1.30        | 1,790        | 2,243    | 1,283    | 1,166 | 749                          | 383   | 747  | 751   |
| hsa-miR-4488    | 1.04E-02 | 2.79E-02 | 0.93         | 106          | 112      | 101      | 131   | 270                          | 186   | 157  | 245   |
| hsa-miR-1244    | 1.13E-02 | 2.96E-02 | -0.93        | 83           | 55       | 88       | 74    | 46                           | 27    | 38   | 47    |
| hsa-miR-342-3p  | 1.29E-02 | 3.30E-02 | -1.15        | 424          | 276      | 402      | 379   | 169                          | 133   | 250  | 117   |
| hsa-miR-331-3p  | 1.31E-02 | 3.27E-02 | 1.15         | 27           | 25       | 25       | 45    | 97                           | 51    | 50   | 71    |
| hsa-miR-130a-3p | 1.36E-02 | 3.31E-02 | 2.29         | 38           | 205      | 107      | 84    | 809                          | 465   | 299  | 559   |

| miRNA           | p-value  | FDR      | Log2<br>(FC) | Untreated       |          |          |       | <i>F. nucleatum</i> -treated |      |      |       |
|-----------------|----------|----------|--------------|-----------------|----------|----------|-------|------------------------------|------|------|-------|
|                 |          |          |              | HCT116          | HT29     | LoVo     | SW480 | HCT116                       | HT29 | LoVo | SW480 |
|                 |          |          |              | hsa-miR-148b-3p | 1.38E-02 | 3.26E-02 | 1.27  | 543                          | 494  | 434  | 577   |
| hsa-miR-378e    | 1.39E-02 | 3.22E-02 | -1.44        | 1,499           | 1,094    | 1,638    | 1,121 | 386                          | 364  | 904  | 321   |
| hsa-miR-5100    | 1.42E-02 | 3.21E-02 | -1.38        | 104             | 75       | 63       | 85    | 41                           | 41   | 26   | 17    |
| hsa-miR-142-3p  | 1.50E-02 | 3.33E-02 | -4.27        | 450             | 864      | 821      | 176   | 2                            | 15   | 95   | 8     |
| hsa-miR-4423-3p | 1.61E-02 | 3.50E-02 | -3.37        | 387             | 1,109    | 673      | 131   | 13                           | 23   | 118  | 68    |
| hsa-miR-146a-5p | 1.64E-02 | 3.48E-02 | -2.21        | 35              | 15       | 37       | 34    | 5                            | 5    | 14   | 2     |
| hsa-miR-185-5p  | 1.64E-02 | 3.41E-02 | -1.74        | 470             | 916      | 423      | 877   | 169                          | 97   | 403  | 133   |
| hsa-miR-20a-3p  | 1.65E-02 | 3.36E-02 | -2.39        | 198             | 519      | 207      | 334   | 31                           | 38   | 148  | 23    |
| hsa-miR-222-3p  | 1.66E-02 | 3.32E-02 | 4.82         | 5               | 84       | 13       | 2     | 1,078                        | 809  | 288  | 761   |
| hsa-miR-320b    | 1.71E-02 | 3.36E-02 | 0.55         | 298             | 217      | 272      | 281   | 483                          | 351  | 394  | 335   |
| hsa-miR-378i    | 1.76E-02 | 3.39E-02 | -1.76        | 777             | 493      | 669      | 367   | 166                          | 88   | 325  | 103   |

| miRNA           | p-value  | FDR      | Log2<br>(FC) | Untreated      |          |          |       | <i>F. nucleatum</i> -treated |       |       |       |
|-----------------|----------|----------|--------------|----------------|----------|----------|-------|------------------------------|-------|-------|-------|
|                 |          |          |              | HCT116         | HT29     | LoVo     | SW480 | HCT116                       | HT29  | LoVo  | SW480 |
|                 |          |          |              | hsa-miR-29a-3p | 1.84E-02 | 3.48E-02 | 2.29  | 175                          | 212   | 228   | 258   |
| hsa-miR-193a-3p | 1.85E-02 | 3.43E-02 | 2.84         | 58             | 62       | 47       | 18    | 329                          | 346   | 72    | 583   |
| hsa-miR-6512-3p | 1.87E-02 | 3.41E-02 | -5.99        | 66             | 45       | 2        | 19    | 0                            | 2     | 0     | 0     |
| hsa-miR-6089    | 1.88E-02 | 3.37E-02 | 0.68         | 474            | 313      | 497      | 346   | 736                          | 631   | 567   | 673   |
| hsa-miR-6803-5p | 1.96E-02 | 3.45E-02 | 0.52         | 69             | 87       | 103      | 83    | 117                          | 149   | 107   | 117   |
| hsa-miR-3665    | 2.00E-02 | 3.45E-02 | 0.76         | 150            | 131      | 147      | 144   | 253                          | 187   | 217   | 310   |
| hsa-miR-148a-3p | 2.06E-02 | 3.50E-02 | 2.02         | 65             | 39       | 62       | 81    | 338                          | 219   | 90    | 355   |
| hsa-miR-6793-5p | 2.16E-02 | 3.62E-02 | -5.36        | 5              | 2        | 55       | 5     | 0                            | 0     | 2     | 0     |
| hsa-let-7c-5p   | 2.26E-02 | 3.71E-02 | 3.22         | 45             | 978      | 367      | 259   | 3,917                        | 4,892 | 1,320 | 5,223 |
| hsa-miR-320c    | 2.26E-02 | 3.66E-02 | 0.64         | 305            | 201      | 236      | 274   | 488                          | 365   | 426   | 306   |
| hsa-miR-144-3p  | 2.49E-02 | 3.96E-02 | -3.51        | 60             | 102      | 162      | 32    | 1                            | 8     | 22    | 1     |

| miRNA           | p-value  | FDR      | Log2<br>(FC) | Untreated    |          |          |       | <i>F. nucleatum</i> -treated |       |       |       |
|-----------------|----------|----------|--------------|--------------|----------|----------|-------|------------------------------|-------|-------|-------|
|                 |          |          |              | HCT116       | HT29     | LoVo     | SW480 | HCT116                       | HT29  | LoVo  | SW480 |
|                 |          |          |              | hsa-miR-548w | 2.64E-02 | 4.15E-02 | -1.94 | 48                           | 35    | 52    | 21    |
| hsa-miR-193b-3p | 2.65E-02 | 4.10E-02 | 3.07         | 115          | 69       | 66       | 69    | 1,150                        | 428   | 160   | 940   |
| hsa-miR-338-3p  | 2.99E-02 | 4.55E-02 | 4.31         | 0            | 5        | 0        | 0     | 13                           | 76    | 10    | 3     |
| hsa-miR-4793-5p | 3.16E-02 | 4.74E-02 | -4.28        | 2            | 30       | 7        | 45    | 0                            | 4     | 0     | 0     |
| hsa-miR-142-5p  | 3.18E-02 | 4.71E-02 | -3.32        | 764          | 1,738    | 1,328    | 717   | 7                            | 39    | 391   | 19    |
| hsa-miR-19b-3p  | 3.22E-02 | 4.69E-02 | -1.47        | 2,927        | 4,032    | 2,896    | 3,742 | 697                          | 1,095 | 2,408 | 708   |
| hsa-miR-340-5p  | 3.32E-02 | 4.78E-02 | -1.14        | 165          | 146      | 211      | 123   | 49                           | 102   | 101   | 40    |
| hsa-miR-4443    | 3.34E-02 | 4.74E-02 | -1.29        | 2,243        | 2,794    | 2,149    | 3,257 | 697                          | 1,020 | 1,893 | 666   |
| hsa-miR-17-3p   | 3.41E-02 | 4.77E-02 | -2.09        | 165          | 184      | 132      | 193   | 27                           | 11    | 103   | 18    |
| hsa-miR-486-5p  | 3.43E-02 | 4.73E-02 | -2.64        | 454          | 500      | 272      | 625   | 12                           | 20    | 245   | 20    |
| hsa-miR-126-3p  | 3.47E-02 | 4.72E-02 | -2.05        | 2,241        | 2,759    | 2,347    | 2,617 | 233                          | 223   | 1,736 | 218   |

| miRNA           | p-value  | FDR      | Log2<br>(FC) | Untreated      |          |          |        | <i>F. nucleatum</i> -treated |       |       |       |
|-----------------|----------|----------|--------------|----------------|----------|----------|--------|------------------------------|-------|-------|-------|
|                 |          |          |              | HCT116         | HT29     | LoVo     | SW480  | HCT116                       | HT29  | LoVo  | SW480 |
|                 |          |          |              | hsa-miR-939-3p | 3.61E-02 | 4.85E-02 | -10.91 | 15                           | 47    | 0     | 4     |
| hsa-miR-126-5p  | 3.74E-02 | 4.95E-02 | -3.24        | 4              | 47       | 43       | 14     | 5                            | 2     | 3     | 1     |
| hsa-miR-3180    | 3.77E-02 | 4.93E-02 | -4.59        | 16             | 2        | 9        | 39     | 0                            | 0     | 0     | 3     |
| hsa-miR-106a-5p | 3.79E-02 | 4.90E-02 | -1.51        | 4,387          | 5,331    | 4,819    | 4,883  | 817                          | 1,547 | 3,609 | 869   |
| hsa-miR-4497    | 3.81E-02 | 4.86E-02 | 1.22         | 117            | 133      | 109      | 142    | 441                          | 250   | 160   | 318   |
| hsa-miR-30e-5p  | 3.87E-02 | 4.88E-02 | 0.67         | 1,408          | 1,547    | 1,283    | 2,210  | 1,999                        | 3,452 | 2,281 | 2,503 |
| hsa-miR-378j    | 3.90E-02 | 4.85E-02 | -3.63        | 26             | 32       | 41       | 13     | 0                            | 9     | 0     | 0     |
| hsa-miR-130b-3p | 3.94E-02 | 4.84E-02 | -2.11        | 1,377          | 1,517    | 1,309    | 1,862  | 92                           | 117   | 1,089 | 103   |
| hsa-miR-450b-3p | 3.96E-02 | 4.81E-02 | -8.57        | 17             | 35       | 0        | 6      | 0                            | 0     | 0     | 0     |
| hsa-miR-548d-3p | 4.06E-02 | 4.87E-02 | -3.94        | 9              | 37       | 5        | 35     | 6                            | 0     | 0     | 0     |
| hsa-miR-4525    | 4.09E-02 | 4.86E-02 | -10.23       | 2              | 1        | 0        | 38     | 0                            | 0     | 0     | 0     |



| miRNA          | p-value  | FDR      | Log2<br>(FC) | Untreated     |          |          |       | <i>F. nucleatum</i> -treated |       |       |       |
|----------------|----------|----------|--------------|---------------|----------|----------|-------|------------------------------|-------|-------|-------|
|                |          |          |              | HCT116        | HT29     | LoVo     | SW480 | HCT116                       | HT29  | LoVo  | SW480 |
|                |          |          |              | hsa-let-7e-5p | 4.14E-02 | 4.85E-02 | 2.31  | 455                          | 837   | 512   | 328   |
| hsa-miR-18a-3p | 4.17E-02 | 4.83E-02 | -2.30        | 167           | 234      | 170      | 252   | 16                           | 12    | 133   | 6     |
| hsa-miR-195-5p | 4.21E-02 | 4.82E-02 | 0.61         | 51            | 81       | 91       | 78    | 140                          | 113   | 103   | 102   |
| hsa-miR-1260b  | 4.24E-02 | 4.81E-02 | -1.13        | 1,077         | 2,224    | 1,160    | 2,577 | 960                          | 613   | 718   | 930   |
| hsa-miR-17-5p  | 4.26E-02 | 4.78E-02 | -1.45        | 4,476         | 5,366    | 4,986    | 5,012 | 832                          | 1,558 | 3,933 | 923   |
| hsa-miR-20a-5p | 4.29E-02 | 4.76E-02 | -1.50        | 4,091         | 6,054    | 5,248    | 5,909 | 909                          | 1,732 | 3,992 | 914   |
| hsa-miR-938    | 4.35E-02 | 4.77E-02 | -10.95       | 15            | 51       | 0        | 1     | 0                            | 0     | 0     | 0     |
| hsa-miR-18a-5p | 4.39E-02 | 4.76E-02 | -1.93        | 1,278         | 1,015    | 1,185    | 1,238 | 99                           | 113   | 941   | 82    |
| hsa-miR-424-5p | 4.41E-02 | 4.73E-02 | 2.48         | 62            | 175      | 103      | 54    | 720                          | 365   | 120   | 999   |
| hsa-miR-15a-5p | 4.59E-02 | 4.88E-02 | -0.60        | 574           | 519      | 624      | 368   | 341                          | 352   | 315   | 367   |
| hsa-miR-378g   | 4.65E-02 | 4.89E-02 | -1.47        | 940           | 600      | 772      | 551   | 248                          | 113   | 525   | 149   |

| miRNA           | p-value  | FDR      | Log2<br>(FC) | Untreated    |          |          |       | <i>F. nucleatum</i> -treated |       |       |       |
|-----------------|----------|----------|--------------|--------------|----------|----------|-------|------------------------------|-------|-------|-------|
|                 |          |          |              | HCT116       | HT29     | LoVo     | SW480 | HCT116                       | HT29  | LoVo  | SW480 |
|                 |          |          |              | hsa-miR-451a | 4.66E-02 | 4.85E-02 | -2.30 | 2,988                        | 3,184 | 2,886 | 3,293 |
| hsa-miR-4793-3p | 4.75E-02 | 4.89E-02 | -10.03       | 8            | 17       | 0        | 56    | 0                            | 0     | 0     | 0     |
| hsa-miR-3065-5p | 4.83E-02 | 4.93E-02 | 2.44         | 0            | 3        | 3        | 6     | 33                           | 13    | 8     | 12    |
| hsa-miR-3138    | 4.88E-02 | 4.93E-02 | -3.74        | 8            | 9        | 1        | 47    | 0                            | 5     | 0     | 0     |
| hsa-miR-18b-5p  | 4.90E-02 | 4.90E-02 | -2.00        | 973          | 783      | 859      | 907   | 70                           | 60    | 718   | 34    |
| hsa-miR-548h-3p | 5.02E-02 | /        | -4.15        | 37           | 33       | 31       | 24    | 0                            | 6     | 1     | 0     |
| hsa-miR-6838-3p | 5.03E-02 | /        | -11.18       | 9            | 41       | 34       | 0     | 0                            | 0     | 0     | 0     |
| hsa-miR-223-3p  | 5.04E-02 | /        | -2.24        | 2,167        | 1,832    | 2,751    | 1,859 | 33                           | 35    | 1,677 | 76    |
| hsa-miR-320e    | 5.19E-02 | /        | 0.55         | 254          | 195      | 210      | 270   | 423                          | 350   | 353   | 235   |
| hsa-miR-503-5p  | 5.28E-02 | /        | 2.60         | 2            | 4        | 8        | 11    | 93                           | 22    | 8     | 22    |
| hsa-miR-20b-5p  | 5.37E-02 | /        | -1.80        | 927          | 3,639    | 1,170    | 812   | 177                          | 1,093 | 297   | 311   |

| miRNA           | p-value  | FDR | Log2<br>(FC) | Untreated      |          |      |       | <i>F. nucleatum</i> -treated |      |      |       |
|-----------------|----------|-----|--------------|----------------|----------|------|-------|------------------------------|------|------|-------|
|                 |          |     |              | HCT116         | HT29     | LoVo | SW480 | HCT116                       | HT29 | LoVo | SW480 |
|                 |          |     |              | hsa-miR-937-5p | 5.44E-02 | /    | -2.86 | 31                           | 38   | 25   | 5     |
| hsa-miR-29c-3p  | 5.68E-02 | /   | 1.78         | 46             | 48       | 64   | 15    | 75                           | 315  | 69   | 136   |
| hsa-miR-196b-5p | 5.85E-02 | /   | 4.14         | 6              | 0        | 1    | 0     | 37                           | 64   | 14   | 12    |
| hsa-miR-338-5p  | 5.98E-02 | /   | 4.37         | 0              | 4        | 0    | 1     | 14                           | 67   | 17   | 1     |
| hsa-miR-3196    | 6.00E-02 | /   | 0.57         | 52             | 41       | 61   | 64    | 102                          | 61   | 93   | 67    |
| hsa-miR-4772-5p | 6.08E-02 | /   | -2.35        | 6              | 16       | 34   | 33    | 0                            | 18   | 0    | 0     |
| hsa-miR-6085    | 6.09E-02 | /   | -0.55        | 65             | 56       | 55   | 37    | 34                           | 41   | 28   | 42    |
| hsa-miR-301b    | 6.19E-02 | /   | -1.77        | 270            | 121      | 261  | 205   | 20                           | 25   | 191  | 14    |
| hsa-miR-378c    | 6.23E-02 | /   | -1.41        | 545            | 298      | 415  | 304   | 160                          | 57   | 294  | 76    |
| hsa-miR-1275    | 6.27E-02 | /   | -0.93        | 238            | 420      | 235  | 397   | 102                          | 215  | 259  | 104   |
| hsa-miR-130b-5p | 6.31E-02 | /   | -2.30        | 108            | 144      | 62   | 141   | 9                            | 6    | 76   | 1     |

| miRNA           | p-value  | FDR | Log2<br>(FC) | Untreated       |          |      |        | <i>F. nucleatum</i> -treated |      |      |       |
|-----------------|----------|-----|--------------|-----------------|----------|------|--------|------------------------------|------|------|-------|
|                 |          |     |              | HCT116          | HT29     | LoVo | SW480  | HCT116                       | HT29 | LoVo | SW480 |
|                 |          |     |              | hsa-miR-7160-5p | 6.32E-02 | /    | -10.21 | 0                            | 1    | 4    | 40    |
| hsa-miR-3960    | 6.49E-02 | /   | 0.34         | 269             | 226      | 283  | 336    | 322                          | 328  | 418  | 340   |
| hsa-miR-186-5p  | 6.49E-02 | /   | -0.61        | 787             | 877      | 880  | 918    | 450                          | 550  | 849  | 422   |
| hsa-miR-6506-5p | 6.54E-02 | /   | 3.44         | 5               | 0        | 0    | 1      | 10                           | 6    | 34   | 11    |
| hsa-miR-4778-5p | 6.56E-02 | /   | -1.37        | 30              | 52       | 50   | 35     | 17                           | 25   | 17   | 5     |
| hsa-miR-30a-3p  | 6.73E-02 | /   | 4.00         | 0               | 17       | 3    | 0      | 127                          | 122  | 26   | 53    |
| hsa-let-7g-3p   | 6.77E-02 | /   | -11.28       | 0               | 76       | 6    | 0      | 0                            | 0    | 0    | 0     |
| hsa-miR-574-5p  | 6.86E-02 | /   | 1.30         | 37              | 33       | 9    | 39     | 116                          | 80   | 41   | 54    |
| hsa-miR-203a    | 7.02E-02 | /   | 4.39         | 0               | 3        | 3    | 1      | 62                           | 42   | 7    | 31    |
| hsa-miR-574-3p  | 7.20E-02 | /   | 1.45         | 32              | 67       | 37   | 40     | 203                          | 123  | 41   | 113   |
| hsa-miR-379-3p  | 7.25E-02 | /   | -2.10        | 79              | 2        | 101  | 137    | 0                            | 0    | 74   | 0     |

| miRNA             | p-value  | FDR | Log2<br>(FC) | Untreated   |          |      |       | <i>F. nucleatum</i> -treated |       |       |       |
|-------------------|----------|-----|--------------|-------------|----------|------|-------|------------------------------|-------|-------|-------|
|                   |          |     |              | HCT116      | HT29     | LoVo | SW480 | HCT116                       | HT29  | LoVo  | SW480 |
|                   |          |     |              | hsa-miR-921 | 7.26E-02 | /    | -1.89 | 1,513                        | 968   | 3,656 | 2,338 |
| hsa-miR-422a      | 7.26E-02 | /   | -1.82        | 76          | 125      | 85   | 18    | 9                            | 43    | 11    | 24    |
| hsa-miR-29b-3p    | 7.27E-02 | /   | 2.01         | 178         | 405      | 291  | 135   | 1,000                        | 1,071 | 218   | 1,775 |
| hsa-miR-885-5p    | 7.29E-02 | /   | -1.87        | 3           | 36       | 19   | 11    | 19                           | 0     | 0     | 0     |
| hsa-miR-224-3p    | 7.46E-02 | /   | 0.96         | 21          | 8        | 26   | 17    | 51                           | 27    | 35    | 24    |
| hsa-miR-550a-3-5p | 7.56E-02 | /   | -2.91        | 19          | 23       | 42   | 14    | 1                            | 12    | 0     | 0     |
| hsa-miR-105-5p    | 7.59E-02 | /   | -2.31        | 38          | 10       | 40   | 38    | 4                            | 1     | 20    | 0     |
| hsa-miR-2682-3p   | 7.64E-02 | /   | 3.97         | 0           | 2        | 1    | 3     | 9                            | 34    | 8     | 42    |
| hsa-miR-378d      | 7.67E-02 | /   | -1.20        | 929         | 559      | 777  | 806   | 299                          | 132   | 733   | 174   |
| hsa-miR-379-5p    | 7.69E-02 | /   | -1.72        | 174         | 3        | 126  | 365   | 0                            | 0     | 203   | 0     |
| hsa-miR-197-3p    | 7.75E-02 | /   | -0.92        | 118         | 281      | 109  | 172   | 93                           | 78    | 121   | 70    |

| miRNA             | p-value  | FDR | Log2<br>(FC) | Untreated       |          |       |       | <i>F. nucleatum</i> -treated |       |       |       |
|-------------------|----------|-----|--------------|-----------------|----------|-------|-------|------------------------------|-------|-------|-------|
|                   |          |     |              | HCT116          | HT29     | LoVo  | SW480 | HCT116                       | HT29  | LoVo  | SW480 |
|                   |          |     |              | hsa-miR-146b-5p | 7.89E-02 | /     | -1.75 | 3,821                        | 1,090 | 4,040 | 3,742 |
| hsa-miR-135b-5p   | 7.98E-02 | /   | -3.67        | 71              | 22       | 106   | 21    | 0                            | 4     | 14    | 0     |
| hsa-miR-7975      | 8.09E-02 | /   | -2.02        | 62              | 136      | 81    | 25    | 2                            | 16    | 18    | 39    |
| hsa-miR-15b-5p    | 8.16E-02 | /   | 0.62         | 1,681           | 1,256    | 1,038 | 1,952 | 2,971                        | 1,545 | 2,505 | 2,104 |
| hsa-miR-10b-5p    | 8.16E-02 | /   | 1.24         | 23              | 127      | 38    | 97    | 155                          | 155   | 217   | 141   |
| hsa-miR-152-3p    | 8.28E-02 | /   | 3.90         | 5               | 5        | 3     | 10    | 212                          | 7     | 20    | 102   |
| hsa-miR-4281      | 8.37E-02 | /   | 0.90         | 93              | 30       | 91    | 50    | 128                          | 107   | 89    | 166   |
| hsa-miR-345-5p    | 8.69E-02 | /   | 0.98         | 12              | 19       | 10    | 39    | 40                           | 46    | 44    | 29    |
| hsa-miR-194-5p    | 8.72E-02 | /   | -1.53        | 1,326           | 1,274    | 2,771 | 2,157 | 95                           | 44    | 2,318 | 148   |
| hsa-miR-223-5p    | 8.74E-02 | /   | -2.52        | 142             | 42       | 146   | 110   | 0                            | 2     | 74    | 1     |
| hsa-miR-450a-1-3p | 8.89E-02 | /   | -6.58        | 6               | 52       | 4     | 0     | 0                            | 1     | 0     | 0     |

| miRNA           | p-value  | FDR | Log2<br>(FC) | Untreated     |          |       |       | <i>F. nucleatum</i> -treated |      |       |       |
|-----------------|----------|-----|--------------|---------------|----------|-------|-------|------------------------------|------|-------|-------|
|                 |          |     |              | HCT116        | HT29     | LoVo  | SW480 | HCT116                       | HT29 | LoVo  | SW480 |
|                 |          |     |              | hsa-miR-25-5p | 8.92E-02 | /     | -1.17 | 32                           | 17   | 22    | 54    |
| hsa-miR-431-5p  | 8.98E-02 | /   | -2.21        | 61            | 10       | 30    | 132   | 2                            | 7    | 35    | 6     |
| hsa-miR-6813-5p | 9.02E-02 | /   | 2.24         | 0             | 0        | 0     | 9     | 2                            | 2    | 2     | 37    |
| hsa-miR-7706    | 9.28E-02 | /   | -2.99        | 78            | 8        | 18    | 5     | 13                           | 0    | 1     | 0     |
| hsa-miR-3074-3p | 9.36E-02 | /   | 3.33         | 6             | 0        | 0     | 2     | 9                            | 50   | 2     | 20    |
| hsa-miR-7-1-3p  | 9.41E-02 | /   | 0.50         | 32            | 47       | 38    | 46    | 82                           | 52   | 54    | 44    |
| hsa-miR-361-5p  | 9.44E-02 | /   | -1.62        | 354           | 773      | 1,061 | 178   | 137                          | 154  | 320   | 156   |
| hsa-miR-675-3p  | 9.51E-02 | /   | 3.67         | 0             | 8        | 2     | 14    | 122                          | 90   | 27    | 56    |
| hsa-miR-378a-3p | 9.75E-02 | /   | -0.98        | 1,960         | 1,225    | 1,732 | 1,834 | 819                          | 359  | 1,723 | 515   |

Abbreviations: FDR, false discovery rate; FC, fold change

Supplementary Table 2: Potential targets of miR-21 from 9 well-known prediction programs using miRWalk2.0 database.

| Gene     | DIANAmT | miRanda | miRDB | miRWalk | RNAhybrid | PICTAR5 | PITA | RNA22 | Targetscan | SUM |
|----------|---------|---------|-------|---------|-----------|---------|------|-------|------------|-----|
| KCNMB2   | 1       | 1       | 1     | 1       | 0         | 1       | 1    | 1     | 1          | 8   |
| LUM      | 1       | 1       | 1     | 1       | 0         | 1       | 1    | 1     | 1          | 8   |
| MSH2     | 1       | 1       | 1     | 1       | 0         | 1       | 1    | 1     | 1          | 8   |
| TRPM7    | 1       | 1       | 1     | 1       | 0         | 1       | 1    | 1     | 1          | 8   |
| CHD7     | 1       | 1       | 1     | 1       | 1         | 1       | 0    | 1     | 1          | 8   |
| RASA1    | 1       | 1       | 0     | 1       | 1         | 1       | 1    | 1     | 1          | 8   |
| C17orf39 | 1       | 1       | 1     | 1       | 1         | 1       | 1    | 0     | 1          | 8   |



Supplementary Table 3: The correlation of *F nucleatum* DNA level, miR-21 expression and clinicopathological factors in CRC patients.

| Characteristics  | Total<br>(n) | Tissue <i>F nucleatum</i> |           |                 | Tissue miR-21 |         |                 | Tissue <i>F nucleatum</i> /miR-21 |           |                 |           |
|------------------|--------------|---------------------------|-----------|-----------------|---------------|---------|-----------------|-----------------------------------|-----------|-----------------|-----------|
|                  |              | Negative                  | Low       | High            | Down          | Up      | L/L             | L/H or                            | H/H       |                 |           |
|                  |              | (n)                       | (n)       | (n)             | (n)           | (n)     | (n)             | (n)                               | H/L (n)   | (n)             |           |
|                  |              |                           |           | <i>P</i> -value |               |         | <i>P</i> -value |                                   |           | <i>P</i> -value |           |
| All cases (n, %) | 90           | 22 (24.4)                 | 34 (37.8) | 34 (37.8)       |               | 45 (50) | 45 (50)         |                                   | 34 (37.8) | 33 (36.7)       | 23 (25.6) |
| Age (years)      |              |                           |           |                 | 0.282         |         |                 | 0.832                             |           |                 | 0.818     |
| < 70             | 51           | 15                        | 16        | 20              |               | 25      | 26              |                                   | 18        | 20              | 13        |
| ≥ 70             | 39           | 7                         | 18        | 14              |               | 20      | 19              |                                   | 16        | 13              | 10        |
| Gender           |              |                           |           |                 | 0.355         |         |                 | 0.832                             |           |                 | 0.438     |
| Female           | 39           | 8                         | 18        | 13              |               | 19      | 20              |                                   | 14        | 17              | 8         |
| Male             | 51           | 14                        | 16        | 21              |               | 26      | 25              |                                   | 20        | 16              | 15        |
| Tumor location   |              |                           |           |                 | 0.378         |         |                 | 0.765                             |           |                 | 0.181     |
| Right hemicolon  | 23           | 9                         | 8         | 6               |               | 13      | 10              |                                   | 13        | 4               | 6         |

| Characteristics | Total<br>(n) | Tissue <i>F nucleatum</i> |     |                 | Tissue miR-21 |     |                 | Tissue <i>F nucleatum</i> /miR-21 |         |                 |       |
|-----------------|--------------|---------------------------|-----|-----------------|---------------|-----|-----------------|-----------------------------------|---------|-----------------|-------|
|                 |              | Negative                  | Low | High            | Down          | Up  | L/L             | L/H or                            | H/H     |                 |       |
|                 |              | (n)                       | (n) | (n)             | (n)           | (n) | (n)             | (n)                               | H/L (n) | (n)             |       |
|                 |              |                           |     | <i>P</i> -value |               |     | <i>P</i> -value |                                   |         | <i>P</i> -value |       |
| Left hemicolon  | 31           | 6                         | 13  | 12              |               | 15  | 16              |                                   | 10      | 14              | 7     |
| Rectum          | 36           | 7                         | 13  | 16              |               | 17  | 19              |                                   | 11      | 15              | 10    |
| Tumor size (cm) |              |                           |     |                 | 0.934         |     |                 | 0.399                             |         |                 | 0.828 |
| < 5             | 46           | 12                        | 17  | 17              |               | 21  | 25              |                                   | 17      | 16              | 13    |
| ≥ 5             | 44           | 10                        | 17  | 17              |               | 24  | 20              |                                   | 17      | 17              | 10    |
| Differentiation |              |                           |     |                 | 0.942         |     |                 | 1.000                             |         |                 | 0.888 |
| Well-moderate   | 80           | 20                        | 30  | 30              |               | 40  | 40              |                                   | 30      | 30              | 20    |
| Poor            | 10           | 2                         | 4   | 4               |               | 5   | 5               |                                   | 4       | 3               | 3     |
| T               |              |                           |     |                 | 0.027         |     |                 | 0.438                             |         |                 | 0.437 |
| Tis – T2        | 17           | 9                         | 6   | 4               |               | 8   | 11              |                                   | 7       | 9               | 3     |

| Characteristics | Total<br>(n) | Tissue <i>F nucleatum</i> |     |                 | Tissue miR-21 |     |                 | Tissue <i>F nucleatum</i> /miR-21 |         |                 |       |
|-----------------|--------------|---------------------------|-----|-----------------|---------------|-----|-----------------|-----------------------------------|---------|-----------------|-------|
|                 |              | Negative                  | Low | High            | Down          | Up  | L/L             | L/H or                            | H/H     |                 |       |
|                 |              | (n)                       | (n) | (n)             | (n)           | (n) | (n)             | (n)                               | H/L (n) | (n)             |       |
|                 |              |                           |     | <i>P</i> -value |               |     | <i>P</i> -value |                                   |         | <i>P</i> -value |       |
| T3 – T4         | 73           | 13                        | 28  | 30              |               | 37  | 34              |                                   | 27      | 24              | 20    |
| N               |              |                           |     |                 | 0.163         |     |                 | 0.673                             |         |                 | 0.654 |
| N0              | 45           | 13                        | 20  | 13              |               | 22  | 24              |                                   | 19      | 17              | 10    |
| N1 – N2         | 45           | 9                         | 14  | 21              |               | 23  | 21              |                                   | 15      | 16              | 13    |
| M               |              |                           |     |                 | 0.447         |     |                 | 0.006                             |         |                 | 0.018 |
| Absence         | 82           | 21                        | 32  | 29              |               | 45  | 37              |                                   | 34      | 30              | 18    |
| Presence        | 8            | 1                         | 2   | 5               |               | 0   | 8               |                                   | 0       | 3               | 5     |
| TNM stage       |              |                           |     |                 | 0.520         |     |                 | 0.008                             |         |                 | 0.156 |
| 0/I             | 15           | 6                         | 5   | 4               |               | 6   | 9               |                                   | 5       | 7               | 3     |
| II              | 30           | 7                         | 14  | 9               |               | 16  | 14              |                                   | 14      | 9               | 7     |

| Characteristics     | Total<br>(n) | Tissue <i>F nucleatum</i> |     |      | Tissue miR-21 |     |       | Tissue <i>F nucleatum</i> /miR-21 |         |     |
|---------------------|--------------|---------------------------|-----|------|---------------|-----|-------|-----------------------------------|---------|-----|
|                     |              | Negative                  | Low | High | Down          | Up  | L/L   | L/H or                            | H/H     |     |
|                     |              | (n)                       | (n) | (n)  | (n)           | (n) | (n)   | (n)                               | H/L (n) | (n) |
| III                 | 37           | 8                         | 13  | 16   | 23            | 14  | 15    | 14                                | 8       |     |
| IV                  | 8            | 1                         | 2   | 5    | 0             | 8   | 0     | 3                                 | 5       |     |
| FOBT                |              |                           |     |      | 0.162         |     | 0.286 |                                   | 0.966   |     |
| Negative            | 40           | 13                        | 14  | 13   | 18            | 22  | 15    | 15                                | 10      |     |
| Positive            | 46           | 7                         | 19  | 20   | 26            | 20  | 18    | 16                                | 12      |     |
| NA                  | 4            |                           |     |      |               |     |       |                                   |         |     |
| Serum CEA<br>(µg/L) |              |                           |     |      | 0.423         |     | 0.310 |                                   | 0.098   |     |
| ≤ 5.9               | 53           | 11                        | 23  | 19   | 29            | 24  | 20    | 23                                | 10      |     |
| > 5.9               | 28           | 7                         | 8   | 13   | 12            | 16  | 10    | 7                                 | 11      |     |



| Characteristics        | Total<br>(n) | Tissue <i>F nucleatum</i> |     |                 | Tissue miR-21 |     |                 | Tissue <i>F nucleatum</i> /miR-21 |         |                 |       |
|------------------------|--------------|---------------------------|-----|-----------------|---------------|-----|-----------------|-----------------------------------|---------|-----------------|-------|
|                        |              | Negative                  | Low | High            | Down          | Up  | L/L             | L/H or                            | H/H     |                 |       |
|                        |              | (n)                       | (n) | (n)             | (n)           | (n) | (n)             | (n)                               | H/L (n) | (n)             |       |
|                        |              |                           |     | <i>P</i> -value |               |     | <i>P</i> -value |                                   |         | <i>P</i> -value |       |
| P53 status             |              |                           |     |                 | 0.892         |     | 0.799           |                                   |         |                 | 0.872 |
| Negative               | 21           | 5                         | 8   | 8               |               | 11  | 10              | 8                                 | 8       | 5               |       |
| Positive               | 57           | 13                        | 19  | 25              |               | 28  | 29              | 20                                | 20      | 17              |       |
| NA                     | 12           |                           |     |                 |               |     |                 |                                   |         |                 |       |
| Lymphatic-<br>invasion |              |                           |     |                 | 0.031         |     | 0.528           |                                   |         |                 | 0.300 |
| Negative               | 27           | 11                        | 9   | 7               |               | 15  | 12              | 13                                | 9       | 5               |       |
| Positive               | 52           | 8                         | 19  | 25              |               | 25  | 27              | 17                                | 18      | 17              |       |
| NA                     | 11           |                           |     |                 |               |     |                 |                                   |         |                 |       |
| Nerve-invasion         |              |                           |     |                 | 0.213         |     | 0.064           |                                   |         |                 | 0.788 |

| Characteristics | Total<br>(n) | Tissue <i>F nucleatum</i> |     |      | Tissue miR-21 |     |       | Tissue <i>F nucleatum</i> /miR-21 |         |       |
|-----------------|--------------|---------------------------|-----|------|---------------|-----|-------|-----------------------------------|---------|-------|
|                 |              | Negative                  | Low | High | Down          | Up  | L/L   | L/H or                            | H/H     |       |
|                 |              | (n)                       | (n) | (n)  | (n)           | (n) | (n)   | (n)                               | H/L (n) | (n)   |
| Negative        | 21           | 8                         | 6   | 7    | 7             | 14  | 7     | 7                                 | 7       |       |
| Positive        | 58           | 11                        | 22  | 25   | 33            | 25  | 23    | 20                                | 15      |       |
| NA              | 11           |                           |     |      |               |     |       |                                   |         |       |
| Smoking         |              |                           |     |      | 0.840         |     | 0.193 |                                   |         | 0.378 |
| Absence         | 80           | 19                        | 30  | 31   | 40            | 40  | 30    | 29                                | 21      |       |
| Presence        | 5            | 1                         | 3   | 1    | 4             | 1   | 3     | 2                                 | 0       |       |
| NA              | 5            |                           |     |      |               |     |       |                                   |         |       |
| Diabetes        |              |                           |     |      | 0.789         |     | 0.893 |                                   |         | 0.671 |
| Absence         | 70           | 17                        | 26  | 27   | 36            | 34  | 26    | 27                                | 17      |       |
| Presence        | 15           | 3                         | 7   | 5    | 8             | 7   | 7     | 4                                 | 4       |       |

| Characteristics | Total<br>(n) | Tissue <i>F nucleatum</i> |     |                 | Tissue miR-21 |     |                 | Tissue <i>F nucleatum</i> /miR-21 |         |                 |
|-----------------|--------------|---------------------------|-----|-----------------|---------------|-----|-----------------|-----------------------------------|---------|-----------------|
|                 |              | Negative                  | Low | High            | Down          | Up  | L/L             | L/H or                            | H/H     |                 |
|                 |              | (n)                       | (n) | (n)             | (n)           | (n) | (n)             | (n)                               | H/L (n) | (n)             |
|                 |              |                           |     | <i>P</i> -value |               |     | <i>P</i> -value |                                   |         | <i>P</i> -value |
| NA              | 5            |                           |     |                 |               |     |                 |                                   |         |                 |
| Appendectomy    |              |                           |     |                 | 1.000         |     | 0.026           |                                   |         | 0.234           |
| Absence         | 79           | 19                        | 30  | 30              |               | 38  | 41              | 29                                | 29      | 21              |
| Presence        | 6            | 1                         | 3   | 2               |               | 6   | 0               | 4                                 | 2       | 0               |
| NA              | 5            |                           |     |                 |               |     |                 |                                   |         |                 |

Abbreviations: NA, not available.



Supplementary Table 4: Primer sequences used in this study.

| Primers            | Sequence 5'-3'                    | Purpose |
|--------------------|-----------------------------------|---------|
| <i>F nucleatum</i> | Forward primer:                   | qPCR    |
|                    | CAACCATTACTTTAACTCTACCATGTTCA     |         |
|                    | Reverse primer:                   |         |
|                    | GTTGACTTTACAGAAGGAGATTATGTAAAAATC |         |
| <i>PGT</i>         | FAM probe:                        | qPCR    |
|                    | GTTGACTTTACAGAAGGAGATTA           |         |
|                    | Forward primer:                   |         |
|                    | ATCCCCAAAGCACCTGGTTT              |         |
| <i>U6</i>          | Reverse primer:                   | qPCR    |
|                    | AGAGGCCAAGATAGTCCTGGTAA           |         |
|                    | FAM probe:                        |         |
|                    | CCATCCATGTCCTCATCTC               |         |
| <i>U6</i>          | Forward primer:                   | qPCR    |
|                    | GTGCTCGCTTCGGCAGCACAT             |         |
|                    | Reverse primer:                   |         |
|                    | GTTTAAGCACTTCGCAAGGTA             |         |

|                |                        |      |
|----------------|------------------------|------|
|                | Forward primer:        |      |
|                | TAGCTTATCAGACTGATGTTGA |      |
| miR-21         |                        | qPCR |
|                | Reverse primer:        |      |
|                | CAGTGCGTGTCGTGGAGT     |      |
|                | Forward primer:        |      |
|                | TGAGGTAGTAGGTTGTATAGTT |      |
| let-7a         |                        | qPCR |
|                | Reverse primer:        |      |
|                | CAGTGCGTGTCGTGGAGT     |      |
|                | Forward primer:        |      |
|                | ATCACATTGCCAGGGATTCC   |      |
| hsa-miR-23a-3p |                        | qPCR |
|                | Reverse primer:        |      |
|                | CAGTGCGTGTCGTGGAGT     |      |
|                | Forward primer:        |      |
|                | ATCACATTGCCAGGGATTACC  |      |
| hsa-miR-23b-3p |                        | qPCR |
|                | Reverse primer:        |      |
|                | CAGTGCGTGTCGTGGAGT     |      |
|                | Forward primer:        |      |
|                | TGAGGTAGTAGATTGTATAGTT |      |
| hsa-let-7f-5p  |                        | qPCR |

|               |                                         |              |
|---------------|-----------------------------------------|--------------|
|               | Reverse primer:                         |              |
|               | CAGTGCGTGTCGTGGAGT                      |              |
|               | Forward primer:                         |              |
|               | TGAGGTAGTAGTTTGTGCTGTT                  |              |
| hsa-let-7i-5p |                                         | qPCR         |
|               | Reverse primer:                         |              |
|               | CAGTGCGTGTCGTGGAGT                      |              |
|               | Forward primer:                         |              |
|               | GATCCGCTGATGTGCACCGACAAGCTTCCTGTCAGACTT | Lentivirus   |
|               | GTCGGTGACATCAGCTTTTTG                   | packaging    |
| shRNA-p50     | Reverse primer:                         | and          |
|               | AATTCAAAAAGCTGATGTGCACCGACAAG           | transduction |
|               | TCTGACAGGAAGCTTGTCGGTGACATCAGCG         |              |
|               | Forward primer:                         |              |
|               | GATCCGCATGGAACCATGGACACTCTTCCTGTCAGAAGT | Lentivirus   |
|               | GTCCATGGTTCCATGC TTTTGG                 | packaging    |
| shRNA-p65     | Reverse primer:                         | and          |
|               | AATTCAAAAAGCATGGAACCATGGACACTTCTGACAGG  | transduction |
|               | AAGAGTGTCATGGTTCCATGCG                  |              |
| shRNA-NC      | Forward primer:                         | Lentivirus   |
|               |                                         | packaging    |

|                  |                                         |                |
|------------------|-----------------------------------------|----------------|
|                  | GATCCGAAGCCAGATCCAGCTTCCCTTCCTGTCAGAGGA | and            |
|                  | AGCTGGATCTGGCTTCTTTTTG                  | transduction   |
|                  | Reverse primer:                         |                |
|                  | AATTCAAAAAGAAGCCAGATCCAGCTTCCCTCTGACAGG |                |
|                  | AAGGGAAGCTGGATCTGGCTTCG                 |                |
|                  | Forward primer:                         |                |
| hsa-miR-21       | ATCCAGCAGCGGTTGAACTC                    | ChIP           |
| promoter         | Reverse primer:                         |                |
|                  | TCCTCCAATTTAAGGCAGAAC                   |                |
|                  | Forward primer:                         |                |
| hsa-miR-21 10 kb | AGGCGGTTGTTGGCTTCAG                     | ChIP           |
| upstream         | Reverse primer:                         |                |
|                  | GACCCAGAGAGTTCTATCAATTGA                |                |
|                  | Forward primer:                         |                |
|                  | GGGGTACCGGAGGACTCCGGAGGACTCCGGAGGACTCC  |                |
| pGL3-WT (hsa-    | GGAGGACTCCGGAGGACTCCGGAGGACTCCCGG       | Luciferase     |
| miR-21)          | Reverse primer:                         | activity assay |
|                  | CCGCTCGAGGGAGTCCTCCGGAGTCCTCCGGAGTCCTCC |                |
|                  | GGAGTCCTCCGGAGTCCTCCGGAGTCCTCCCC        |                |

|                      |                                         |                           |
|----------------------|-----------------------------------------|---------------------------|
|                      | Forward primer:                         |                           |
| pGL3-MT (hsa-miR-21) | GGGGTACCCTGACGGCGACTGACGGCGACTGACGGCGA  |                           |
|                      | CTGACGGCGACTGACGGCGACTGACGGCGA CGG      | Luciferase activity assay |
|                      | Reverse primer:                         |                           |
|                      | CCGCTCGAGTCGCCGTCAGTCGCCGTCAGTCGCCGTCAG |                           |
|                      | TCGCCGTCAGTCGCCGTCAGTCGCCGTCAGCC        |                           |
|                      | Forward primer:                         |                           |
| TLR4                 | GGATGAGGACTGGGTAAGGAATGA                | qPCR                      |
|                      | Reverse primer:                         |                           |
|                      | AGCGGCTCTGGATGAAGTGC                    |                           |
|                      | Forward primer:                         |                           |
| TLR2                 | GCGTGGCCAGCAGGTTTCAG                    | qPCR                      |
|                      | Reverse primer:                         |                           |
|                      | GAGCCAGGCCACATCATTTC                    |                           |
|                      | Forward primer:                         |                           |
| MYD88                | GCCGCCGATGGTGGTGGTTGT                   | qPCR                      |
|                      | Reverse primer:                         |                           |
|                      | TTGGTGCAGGGTTGGTGTAGTCG                 |                           |

|        |                           |      |
|--------|---------------------------|------|
|        | Forward primer:           |      |
|        | GTGGCCGGTGCTGCTGTTGC      |      |
| RASA1  |                           | qPCR |
|        | Reverse primer:           |      |
|        | TGGCCACCTGTTCCCTCCTCGTATT |      |
|        | Forward primer:           |      |
|        | TGTAGTTGAGGTCAATGAAGGG    |      |
| GAPDH  |                           | qPCR |
|        | Reverse primer:           |      |
|        | ACATCGCTCAGACACCATG       |      |
|        | Forward primer:           |      |
|        | AATCACACTCCTGCGTCATACAT   |      |
| KCNMB2 |                           | qPCR |
|        | Reverse primer:           |      |
|        | TCCCCGGAAGAAGTCAGGTTA     |      |
|        | Forward primer:           |      |
|        | GGGTGTTAAAATGTCCGCAGTTGA  |      |
| LUM    |                           | qPCR |
|        | Reverse primer:           |      |
|        | GTTCCCCATGTCTCCAGCAGTCT   |      |
|        | Forward primer:           |      |
| MSH2   |                           | qPCR |
|        | GGGTGTTAAAATGTCCGCAGTTGA  |      |

|          |                          |      |
|----------|--------------------------|------|
|          | Reverse primer:          |      |
|          | GTTTCCCATGTCTCCAGCAGTCT  |      |
|          | Forward primer:          |      |
|          | GGTTCCTCTTCTGGTGCCTTATTC |      |
| TRPM7    |                          | qPCR |
|          | Reverse primer:          |      |
|          | TGGTTGGTGGGGATGACAGAT    |      |
|          | Forward primer:          |      |
|          | GAACCGCCCGACCTCTCCTCCATA |      |
| CHD7     |                          | qPCR |
|          | Reverse primer:          |      |
|          | TGCCGTCCACACTCCCACCACTCT |      |
|          | Forward primer:          |      |
|          | ATCCCGCCGCCGCCATCAA      |      |
| C17orf39 |                          | qPCR |
|          | Reverse primer:          |      |
|          | CAAAGGTAAGAGTTCCCCGTGTCC |      |
|          | Forward primer:          |      |
|          | TAAAGCTGGAAAGGGACGAACT   |      |
| PTEN     |                          | qPCR |
|          | Reverse primer:          |      |
|          | ATAGCGCCTCTGACTGGGAATA   |      |

|       |                          |      |
|-------|--------------------------|------|
|       | Forward primer:          |      |
|       | CGAGCCCCAGATTATTGCCAGAG  |      |
| RECK  |                          | qPCR |
|       | Reverse primer:          |      |
|       | GCCTAAGCCAACCCAGCCATCAGA |      |
|       | Forward primer:          |      |
|       | TGGCAGTGGCAGTTCGTTAGTTGT |      |
| SPRY1 |                          | qPCR |
|       | Reverse primer:          |      |
|       | TGTCCGAGGAGCAGGTCTTTCA   |      |
|       | Forward primer:          |      |
|       | ACGGCGGGCCAGGAGGACTACGA  |      |
| RHOB  |                          | qPCR |
|       | Reverse primer:          |      |
|       | TGGGCACATTGGGACAGAAG     |      |

---



## Supplementary Figure Legends

### Supplementary Figure 1: *F nucleatum* promotes CRC cell proliferation

a) HCT116 and LoVo cells were incubated with PBS, *E coli* DH5 $\alpha$  or *F nucleatum*. The cell proliferation was evaluated by CCK-8 assay after treatment at 6h, 24 and 48 hr. (n = 3. \**P* < 0.05, \*\**P* < 0.01, \*\*\**P* < 0.001). b) The cell cycle distribution of treated or control cells was determined by flow cytometry-based assay after treatment at 48 hr. These results are representative of at least three independent experiments.

### Supplementary Figure 2: *F nucleatum* promotes CRC invasion

HCT116 and LoVo cells were incubated with PBS, *E coli* DH5 $\alpha$  or *F nucleatum*. Wound healing assay was performed to evaluate the invasion capability of treated or control cells (10 $\times$ ).

### Supplementary Figure 3: *F nucleatum* promotes CRC development in vivo

The *F nucleatum*-treated LoVo cells were subcutaneously injected into male BALB/C nude mice and generated the xenograft animal model. a) The representative images of xenograft mice (n = 5) and immunostaining for Ki-67 (200 $\times$ ) in xenograft tumor tissues. b) Tumor growth curve and tumor weight after DH5 $\alpha$ , *F nucleatum* or PBS treatment (n = 5. \*\**P* < 0.01 by one-way analysis of variance (ANOVA) and Bonferroni's multiple comparison test). Bars represent standard deviation (SD).

### Supplementary Figure 4: *F nucleatum* did not promote CRC apoptosis in vivo

The representative immunostaining for TUNEL (200 $\times$ ) in xenograft tumor tissues (HCT116 and LoVo cells)

### Supplementary Figure 5: *F nucleatum* promotes tumorigenicity in *Apc*<sup>Min/+</sup> mouse

a) Representative image of a small intestine of APC<sup>Min/+</sup> mice with or without *F nucleatum* treatment (n = 10). b-d) On 20 weeks, *F nucleatum*-treated APC<sup>Min/+</sup> mice showed slight but no significant increase in the tumor numbers, tumor size and tumor load in small intestine (n = 10, Mann-Whitney *U* test).

**Supplementary Figure 6: The validation of *F nucleatum*-induced miRNA in HCT116 and LoVo cells**

a) qRT-PCR showed expression alteration of several candidates (let7f-5p, let7i-5p, miR23a-3p, let7a-5p, miR23b-3p, and miR21-5p) in *F nucleatum*-treated HCT116 cells and control cells. b) qRT-PCR showed expression alteration of several candidates in *F nucleatum*-treated LoVo cells and control cells. All results are representative of triplicate experiments (\* $P < 0.05$ , \*\* $P < 0.01$  by unpaired Student's  $t$  test. NS, no significance). Results represent means values  $\pm$  SD.

**Supplementary Figure 7: *F nucleatum* infection showed less impact on miR21a<sup>-/-</sup> mice**

a) miR-21 expression in normal epithelial cells and CRC cells (\*\* $P < 0.01$ , \*\*\* $P < 0.001$  by unpaired Student's  $t$  test. NS, no significance). Results represent means values  $\pm$  SD). b) Hematoxylin and eosin (H&E) stains have been used for recognizing morphologic changes of CRC tissues from *F nucleatum*-treated miR-21a wild type (WT, miR-21<sup>wt</sup>) or knockout (KO, miR21a<sup>-/-</sup>) mice. c) A representative small intestine in *F nucleatum*-treated miR-21<sup>wt</sup> or miR21a<sup>-/-</sup> mice after 20 weeks was showed in the left upper picture. The red arrows indicated the positive location. On 20 weeks, *F nucleatum*-treated miR21a<sup>-/-</sup> mice showed slight but no significant increase in the tumor number, tumor size and tumor load of small intestine (Mann-Whitney  $U$  test.  $n = 7$  mice per group).

**Supplementary Figure 8: *F nucleatum* affect several already proved miR-21 targets.**

Several already evidenced targets of miR-21 (PTEN, RECK, SPRY1 and RHOB)<sup>1</sup> was tested in HCT116 and LoVo cells with or without *F nucleatum*-treatment. The mRNA levels of these miR-21 targets were measured by qRT-PCR. All bars represent the mean values  $\pm$  SD. All results are representative of triplicate experiments (\*\* $P < 0.01$ , \*\*\* $P < 0.001$  by unpaired Student's  $t$  test. NS, no significance).

**Supplementary Figure 9: Validation of miR-21 putative targets in HCT116 cells.**

*F nucleatum*-treated HCT116 cells were incubated with miR-21 mimics, inhibitors or scramble controls. The expression of potential miR-21 target genes were measured by qRT-PCR. All bars represent the mean values  $\pm$  SD. All results are representative of triplicate experiments ( $**P < 0.01$ ,  $***P < 0.001$  by unpaired Student's *t* test. NS, no significance).

**Supplementary Figure 10: Validation of miR-21 putative targets in LoVo cells.**

*F nucleatum*-treated LoVo cells were incubated with miR-21 mimics, inhibitors or scramble controls. The expression of potential miR-21 target genes were measured by qRT-PCR. All bars represent the mean values  $\pm$  SD. All results are representative of triplicate experiments ( $*P < 0.05$ ,  $**P < 0.01$ ,  $***P < 0.001$  by unpaired Student's *t* test. NS, no significance).

**Supplementary Figure 11: silence of NF $\kappa$ B impaired the *F nucleatum*'s oncogenic effect on cell proliferation and invasion in HCT116 cells.**

a) CCK-8 assay showed silence of NF $\kappa$ B significantly impaired the *F nucleatum*'s oncogenic effect on cell proliferation ( $*P < 0.05$  by unpaired Student's *t*-test. Bars represent SD of three experiments). b) Wound healing assay showed silence of NF $\kappa$ B impaired the invasion capability of *F nucleatum*-treated cells (10 $\times$ )

## Supplementary Materials and Methods

### *Patients and specimen collection*

We used 2 independent cohorts of CRC tissues. For the expression correlation analysis, we used 90 fresh frozen matched cancer and normal samples obtained from Six People's Hospital Affiliated to Shanghai Jiao Tong University from 2012 to 2013. For the survival analysis, we used 125 fresh frozen cancer tissues, which were collected at the Mie University, Japan. Written informed consent was obtained from all patients, and the study was approved by the Institutional Review Boards of all participating institutions.

### *Bacterial strain and culture conditions*

The *F nucleatum* strain was obtained from American type culture collection (ATCC, *F nucleatum* subsp. *nucleatum* ATCC 25586) and was cultured as described previously<sup>2,3</sup>. In brief, *F nucleatum* was grown in Columbia blood agar supplemented with 5 µg/ml haemin, 5% defibrinated sheep blood (5%), and 1 µg/ml vitamin K1 (Sigma-Aldrich, St. Louis., MO, USA) in an anaerobic glove box with 85% N<sub>2</sub>, 10% H<sub>2</sub>, and 5% CO<sub>2</sub> at 37°C. The *E coli* Strain DH5a (Invitrogen, Carlsbad, CA, USA) was propagated in Luria-Bertani (BD Biosciences, Difco, MD, USA) medium aerobically at 37°C.

### *Cell culture*

The CRC cell lines (HCT116, SW480, HT29, Caco2, LoVo, SW620, DLD1, RKO, Colo205) and IEC were provided by the American Type Culture Collection (ATCC, Manassas, VA, USA). The human normal colon epithelial cell line NCM460 was obtained from the INCELL Corporation (San Antonio, TX, USA). All of the cell lines were cultured in appropriate conditions as described previously<sup>4,5</sup>.

### *Cell proliferation assays*

For the cell proliferation analysis, resuspension solution of HCT116 and LoVo cells were seeded at  $1 \times 10^4$  per well in the 24-well plates with 2 ml complete medium. Cells were incubated with *F nucleatum* or

DH5 $\alpha$  at an multiplicity of infection (MOI) of 1000:1. Cells treated with PBS were set as negative control. Cells number counts were performed using a hemocytometer at 6 hr, 24 hr and 48 hr. Each test was repeated in triplicate.

#### *Wound healing assays*

Before the experiments, the back of each 6-well plate was marked out to set a unified location. CRC cells (HCT116 and LoVo,  $5 \times 10^5$  per well ) were left to grow until confluent and wounded with a pipette tip. Then the cells of each well were co-incubated with *F nucleatum* or DH5 $\alpha$  at an MOI of 1000:1. Cell images were taken at 6, 24 hr, and 48 hr. The wound size of each well was calculated as the distance between the edges.

#### *Cell growth assays*

Cells number counts were performed using a hemocytometer. Cell viability was analyzed using a Cell Counting Kit according to the manufacturer's instruction (CCK-8, Dojindo, Kumamoto, Japan).

#### *Cell cycle assays*

CRC cells were harvested and incubated with 50 $\mu$ g/ml propidium iodide (PI, Sigma-Aldrich, St. Louis., MO, USA) followed by 100 $\mu$ g/ml Rnase A and 0.2% Triton X-100. The stained cells were measured by flow cytometry (BD Bioscience, San Jose, CA, USA).

#### *Immunohistochemistry (IHC) and Western blotting (WB)*

For IHC, Dako envision+dual link system-HRP (DAB+) (Dako, Carpinteria, CA) were used according to the manufacturer's instructions. For WB, cell extracts were collected using T-PER Tissue Protein Extraction Reagent (Thermo Fisher Scientific, Wilmington, DE, USA) and loaded on to the 10% polyacrylamide-SDS gels, followed by transfer of electrophoresed proteins onto nitrocellulose

membranes. The membranes were then blocked in 5% fat-free milk and incubated with the following primary and secondary antibodies. The probe proteins were detected using enhanced chemiluminescence according to manufacturer's instructions. All the antibodies were purchased from Abcam.

#### *Plasmids, lentivirus shRNA construction*

The specific siRNA targeting coding region of p65 or p50 was as follow: siRNA-p65, 5'-GCTGATGTGCACCGACAAG-3'; siRNA-p50, GCATGGAACCATGGACACT-3'. A non-targeting sequence (5'-GAAGCCAGATCCAGCTTCC-3') was set as negative control (NC). The DNA fragments containing loop-structure for specific short-hairpin RNA (shRNA) and restriction sites (the XhoI in the up position and the BamHI in the down position) were synthesized (Invitrogen, Carlsbad, CA, USA) and amplified. Then the gene fragments were cloned into the pSIH1-H1-copGFP shRNA Cloning and Expression Vector (System Biosciences (SBI), Mountain View, CA, USA).

#### *Cell transfection with miR-21 mimics or inhibitors*

Cells were cultured and transfected with miR-21 mimics or negative control chemical synthesis oligonucleotides (GenePharma Corp., Shanghai, China) using Lipofectamine 2000 reagent (Invitrogen, Carlsbad, CA, USA) in indicated concentrations according to the supplier's instructions.

#### *DNA extraction and *F nucleatum* quantification*

Genomic DNAs from clinical human frozen samples were extracted using QIAamp DNA Mini Kit (Qiagen, GmbH, Hilden, Germany). The Taqman assay was used to amplify *F nucleatum*. The custom-made primers of *F nucleatum* were provided by the TaqMan primer/probe sets (Applied Biosystems, Foster City, CA, USA)<sup>7</sup>. Amplification and detection of *F nucleatum* gene were performed using TaqMan Environmental Master Mix 2.0 (Applied Biosystems, Foster City, CA, USA) on the Applied Biosystems

7500 RT-PCR System<sup>8</sup>. The thermal cycles were 95°C for 10 minutes and 45 cycles of 15 seconds at 95°C and 1 minute at 60°C. The *PGT* gene was used as internal control.

#### *miRNA/mRNA microarray*

Total RNAs were extracted from 4 cell lines (HCT116, HT29, LoVo and SW480), which treated by *F nucleatum* or PBS by using RNeasy Mini Kit (Qiagen, GmbH, Hilden, Germany).  $\mu$ Paraflo™ MicroRNA microarray Assay was done using miRBase version 21.0 by LC Sciences (LC Sciences, Houston, TX, USA). Briefly, 5 $\mu$ g total RNAs were 3'-extended with a poly (A) tail and then ligated with an oligonucleotide tag conjugating Cy3 dye staining. The RNAs were hybridized overnight to a  $\mu$ Paraflo microfluidic chip containing complementary target microRNA from miRBase (<http://www.mirbase.org/>). Fluorescence images were measured with a GenePix 400B laser scanner (Molecular Device, Sunnyvale, CA, USA) and digitized with a Array-Pro image analysis software (Media Cybernetics, Silver Spring, MD, USA). The miRNA array data were calculated by firstly subtracting the background value and then normalizing the signals by locally-weighted regression. The express levels of miRNAs were designated as statistically significant when the two-tailed P value was less than 0.05. And signals lower than 500 were interpreted as false positive result. The mRNA expression profiling was determined in *F nucleatum*-treated and *F nucleatum*-untreated HCT116 cells using SurePrint G3 Human Gene Expression v2 Microarray (Agilent Technologies, Santa Clara, CA, USA). The statistically significant mRNAs were selected based on the fold change and adjusted P value less than 0.05.

#### *Tumor xenograft study*

HCT116 and LoVo cells were co-cultured with *F nucleatum*, DH5 $\alpha$  or PBS at an MOI of 1000:1 for 24 hr. Then cells were washed thrice with PBS and harvested by trypsinization. Cell resuspension solution were then mixed with *F nucleatum*, DH5 $\alpha$  or PBS at an MOI of 20:1 and were injected (100  $\mu$ l per mouse) subcutaneously into the right flank of 6-week-old male nude mice (BALB/C, Shanghai, Chinese Academy of Sciences, China). 3 hr after hypodermic injection, all mice were intraperitoneally injected

with 150 mg/kg piperacillin to kill bacteria as described previously<sup>9</sup>. Nude mice were raised in the specific-pathogen-free (SPF) conditions with autoclaved food and water. The tumor volumes (Vol) were monitored at set times and were calculated as follows:  $Vol = 1/2(\text{length-diameter} \times \text{width-diameter}^2)$ . Mice were euthanized on day 39 and the tumor weight was measured. Tissues were snap frozen in liquid nitrogen and stored at -80 °C. Experiments were performed with 6 mice (HCT116 cells) or 5 mice (LoVo cells) in each group.

#### *Cell apoptosis Assay*

The tumor cell apoptosis was detected by the terminal deoxynucleotidyl transferase-mediated dUTP-biotin nick end labeling assay (TUNEL) assay. Briefly, 5 $\mu$ m-thick formalin-fixed paraffin-embedded (FFPE) section of tumor xenograft was stained using the In Situ Cell Death Detection Kit, POD (Roche Diagnostics GmbH, Mannheim, Germany) according to manufacturer's instructions. The cell nucleus was counterstained with hematoxylin. Slides were analyzed under a light microscope.

#### *Mouse model*

C57BL/6J-Adenomatous polyposis coli (APC)<sup>min</sup>/J mice (APC<sup>min/+</sup>) were provided from Nanjing Biomedical Research Institute of Nanjing University (NBRI). C57BL/6J miR-21 knockout (KO, miR-21a<sup>-/-</sup>) and C57BL/6J wild-type (WT) mice were provided and bred as previously described<sup>10</sup>. All mice were housed and reared in SPF and barrier conditions with autoclaved food and water at the animal center of Shanghai Tenth People's Hospital Affiliated to Tongji University. The body weight of mice were measured every week.

For miR-21a<sup>-/-</sup> mouse model, 8-9-week-old mice were additionally given two cycles of one single intraperitoneal injection of carcinogen azoxymethane (AOM) at 12 mg/kg body weight followed by five successive days of 2% dextran sodium sulfate (DSS) in the drinking water, and then were given regular drinking water. During the DSS intervention, the bacteria administration was suspended.



Before bacterial intragastric administration, APC<sup>min/+</sup> or miR-21a<sup>-/-</sup> mice were fed with 2 mg/ml streptomycin in the drinking water for 3 days to ensure the consistency of regular microbiota and facilitate *F nucleatum* colonisation. PBS-resuspended 10<sup>9</sup> colony-forming units (CFU) *F nucleatum* or PBS were administered into 5-6 weeks APC<sup>min/+</sup> or miR-21a<sup>-/-</sup> male mice by gavage every day. To investigate the *F nucleatum*-induced gut tumor progression, bacteria or PBS administration was given for a period of 24 weeks. For *F nucleatum*-influenced survival, *F nucleatum*-treated APC<sup>min/+</sup> or miR-21a<sup>-/-</sup> mice were followed up until moribund. At the indicated time intervals, the mice were anaesthetized with 40mg/kg pentobarbital sodium and sacrificed for tumor statistics and histopathological analysis. Tissues were longitudinally opened and measured. The tumor numbers were counted and the tumour sizes (diameter) were quantified as <1 mm, 1-2 mm, 2-3 mm, > 3 mm. The algorithm of tumor load was the sum of every tumor diameter.

#### *Enzyme linked immunosorbent assay (ELISA)*

The mice serum was collected from each group and immediately stored at liquid nitrogen. The Quantification of serum cytokine was determined using Quantibody® Mouse Th17 Array 1 Kit (RayBiotech, Norcross, Georgia (GA), USA) following the manufacturers' protocol. The cytokines detected included the IFN-gamma, IL1 beta, IL10, IL12 p70, IL13, IL17A, IL17F, IL2, IL21, IL22, IL23 p19, IL28A, IL4, IL5, IL6, MIP3 alpha, TGF beta 1, and TNF alpha.

#### *Cell transfection with miR-21 mimics or inhibitors*

Cells were cultured and transfected with miR-21 mimics (sense: 5'-UAGCUUAUCAGACUGAUGUUGATT-3'; antisense: 5'-UCAACAUCAGUCUGAUAAGCUATT-3'), inhibitor (5'-UCAACAUCAGUCUGAUAAGCUATT-3') or negative control (NC, 5'-ACUAGUCGAUCUAUGUGUGAUATT-3') chemical synthesis oligonucleotides (GenePharma Corp., Shanghai, China) using Lipofectamine 2000 reagent (Invitrogen, Carlsbad, CA, USA) in indicated

concentrations according to the supplier's instructions. The efficiency after transfection was analysed using fluorescence microscopy.

#### *Plasmids, lentivirus shRNA construction and transfection*

The specific siRNA targeting coding region of p65 or p50 was as follow: siRNA-p65, 5'-GCTGATGTGCACCGACAAG-3'; siRNA-p50, GCATGGAACCATGGACACT-3'. A non-targeting sequence (5'-GAAGCCAGATCCAGCTTCC-3') was set as negative control (NC) The DNA fragments containing loop-structure for specific short-hairpin RNA (shRNA) and restriction sites (the XhoI in the up position and the BamHI in the down position) were synthesized (Invitrogen, Carlsbad, CA, USA) and amplified. Then the gene fragments were cloned into the pSIH1-H1-copGFP shRNA Cloning and Expression Vector (System Biosciences (SBI), Mountain View, CA, USA). Competent DH5 $\alpha$  was mixed with 10  $\mu$ l ligated products and grow in Super Optimal broth with Catabolite repression (SOC) culture medium. The positive clones in constructed plasmids were confirmed by sequencing. 293T cell was co-transfected with 4 $\mu$ l plasmid vector and 20 $\mu$ l pPACKH1 HIV Lentiviral Packaging Kit according to the protocol of SBI (Mountain View, CA, USA). After 48hr, the recombinant lentiviruses were harvested. HCT116 or LoVo cells were transfected with the recombinant shRNA lentiviruses at an MOI of 20 for subsequent experiments

#### *Luciferase reporter assay*

For the validation of the miR-21 target, the 3'UTR segment of RasA1 containing the wild-type (WT) or mutant (MT) target site for miR-21 was amplified by PCR from genome cDNA and inserted into the pGL3-Promoter Vector (Promega, Wisconsin (WI), USA). The CRC cell line HCT116 was transfected with the synthetic miR-21 mimics/miR-21 inhibitor/NC and co-transfected with the pGL3 plasmid and firefly luciferase report vector in 24-well plates using the Lipofectamine 2000 reagent (Invitrogen Corp., California (CA), USA). To verify if NF $\kappa$ B could putatively bind to the miR-21 promoter, the WT or MT

DNA fragments of the miR-21 promoter were amplified and cloned into the pGL3-Promoter Vector. The control plasmid or reporter plasmid was co-transfected with Lv-shRNA-p65 vector into 293 cell using the Lipofectamine 2000 reagent. Luciferase assays were measured 48 hr after transfection using the Dual-Luciferase Reporter Assay System (Promega, WI, USA) according to the manufacturer's protocol, with the Renilla luciferase activity as a normaliser. The transfection efficiency data were normalized by dividing the Firefly luciferase activities with that of Renilla luciferase. The primers used were described in supplementary table S1. All PCR clones products were identified by DNA sequencing. Each assay was performed independently in triplicate.

#### *Chromatin immunoprecipitation (ChIP)*

ChIP reactions were performed using the ChIP Assay Kit (Millipore, Merck KGaA, Darmstadt, Germany) according to the manufacturer's operation manual. Briefly, HCT116 cells were treated with *F nucleatum* or PBS for 24 hours. The collected and resuspended cells were cross-linked with 1% formaldehyde at 37°C for 10 minutes and quenched by glycine. Cells were then resuspended in lysis buffer on ice for 10 minutes. The lysate were sonicated into 200-1000 base pairs. After centrifugation, the supernatant containing chromatin and magnetic beads was incubated with specific antibodies: anti-NFκB p65 (Santa Cruz Biotechnology) or normal mouse immunoglobulin G (IgG, Santa Cruz Biotechnology, Santa Cruz, CA, USA) at 37°C overnight for immunoprecipitation. The DNA/antibody/magnetic bead complexes were washed and eluted with low salt immune complex wash buffer following by high salt immune complex wash buffer, LiCl immune complex wash buffer and TE buffer. The purified chromatin DNA samples were measured with primers[26] for the promoter of hsa-miR-21 gene or 10 kb upstream regions of has-miR-21 by real-time PCR using the SYBR Premix Ex Taq (Takara Biotechnology, Dalian, China) with a 7500 Real-Time PCR System according to the manual supplied by Applied Biosystems (Carlsbad, CA, USA). Three independent reactions were performed.

### *Fluorescence in situ hybridization (FISH)*

Localization of *F nucleatum* and miR-21 in CRC and adjacent normal tissues was performed by FISH on 5µm FFPE sections as described previously<sup>11, 12</sup>. For the detection of miR-21, the digoxigenin-labeled Locked Nucleic Acid (LNA) mirCURY miRNA detection probe (miR-21: Digoxigenin-5'-TCAACATCAGTCTGATAAGCTA-3'-Digoxigenin, dilution ratio 1:100) was purchased from Exiqon (Vedbaek, Denmark). The small nuclear RNA U6 was set as positive control. For the detection of *F nucleatum*, the digoxigenin-labeled *F nucleatum* probe (Digoxigenin-5'-CGCAATACAGAGTTGAGCCCTGC-3'-Digoxigenin, dilution ratio 1:100) and universal bacterial probe (Digoxigenin-5'-GCTGCCTCCCGTAGGAGT-3'-Digoxigenin) were acquired from probeBase (<http://www.microbial-ecology.net/probebase/>) and synthesized by Sangon Biotech Company (Shanghai, China).

### *Statistical analyses*

Differences of the quantitative data between two groups were performed using the unpaired or paired Student's t-test, Mann-Whitney U-test, or Dunnett's t-test, where appropriate. Comparisons of means among multiple groups were determined by one-way analysis of variance (ANOVA) tests. The relationships between the abundance of *F nucleatum* and the expression level of miR-21 was analyzed by using linear regression. The associations between the patient categorical characteristics were done using Pearson's Chi-square test or Fisher exact test, as appropriate. The median value was chosen as cutoff point. The impacts of clinical parameters were estimated by using univariate or multivariate Cox proportional hazards regression model analysis. The overall survival which was classed as the time from the first disease diagnosis to the date of death or last contact was designated as endpoints of interest. The Kaplan-Meier survival curves and log-rank tests were performed to determine the statistical analyses of overall survival. All P values were two-tailed and P values less than 0.05 were designated as significant difference (\*P < 0.05, \*\* P < 0.01, \*\*\* P < 0.001). All statistical analyses were done by using the

GraphPad Prism 6 software (GraphPad software, Inc., San Diego, California, USA) and IBM SPSS Statistics 20.0 software (IBM, Inc., Chicago, Illinois, USA).

## References

1. Jung EJ, Calin GA. The Meaning of 21 in the MicroRNA world: perfection rather than destruction? *Cancer Cell* 2010;18:203-5.
2. Kostic AD, Chun E, Robertson L, et al. *Fusobacterium nucleatum* potentiates intestinal tumorigenesis and modulates the tumor-immune microenvironment. *Cell Host Microbe* 2013;14:207-15.
3. Fardini Y, Wang X, Temoin S, et al. *Fusobacterium nucleatum* adhesin FadA binds vascular endothelial cadherin and alters endothelial integrity. *Mol Microbiol* 2011;82:1468-80.
4. Ma Y, Yang Y, Wang F, et al. Long non-coding RNA CCAL regulates colorectal cancer progression by activating Wnt/beta-catenin signalling pathway via suppression of activator protein 2alpha. *Gut* 2015.
5. Ma Y, Zhang P, Wang F, et al. Human embryonic stem cells and metastatic colorectal cancer cells shared the common endogenous human microRNA-26b. *Journal of cellular and molecular medicine* 2011;15:1941-54.
6. Livak KJ, Schmittgen TD. Analysis of relative gene expression data using real-time quantitative PCR and the 2(-Delta Delta C(T)) Method. *Methods* 2001;25:402-8.

7. Mima K, Sukawa Y, Nishihara R, et al. *Fusobacterium nucleatum* and T Cells in Colorectal Carcinoma. *JAMA Oncol* 2015;1:653-61.
8. Tahara T, Yamamoto E, Suzuki H, et al. *Fusobacterium* in colonic flora and molecular features of colorectal carcinoma. *Cancer Res* 2014;74:1311-8.
9. Coughnoux A, Dalmaso G, Martinez R, et al. Bacterial genotoxin colibactin promotes colon tumour growth by inducing a senescence-associated secretory phenotype. *Gut* 2014;63:1932-42.
10. Shi C, Yang Y, Xia Y, et al. Novel evidence for an oncogenic role of microRNA-21 in colitis-associated colorectal cancer. *Gut* 2015.
11. Ma Y, Zhang P, Wang F, et al. miR-150 as a potential biomarker associated with prognosis and therapeutic outcome in colorectal cancer. *Gut* 2012;61:1447-1453.
12. Sigge A, Essig A, Wirths B, et al. Rapid identification of *Fusobacterium nucleatum* and *Fusobacterium necrophorum* by fluorescence in situ hybridization. *Diagn Microbiol Infect Dis* 2007;58:255-9.

# Supplementary Figure 1

A

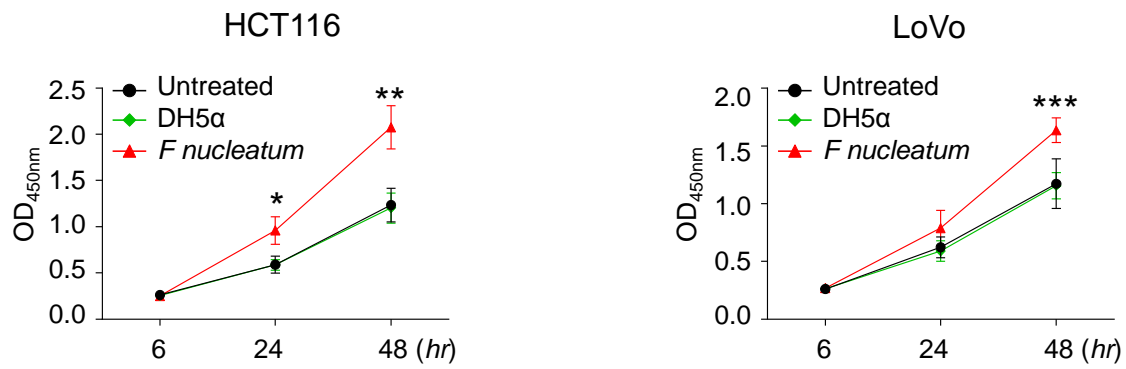

B

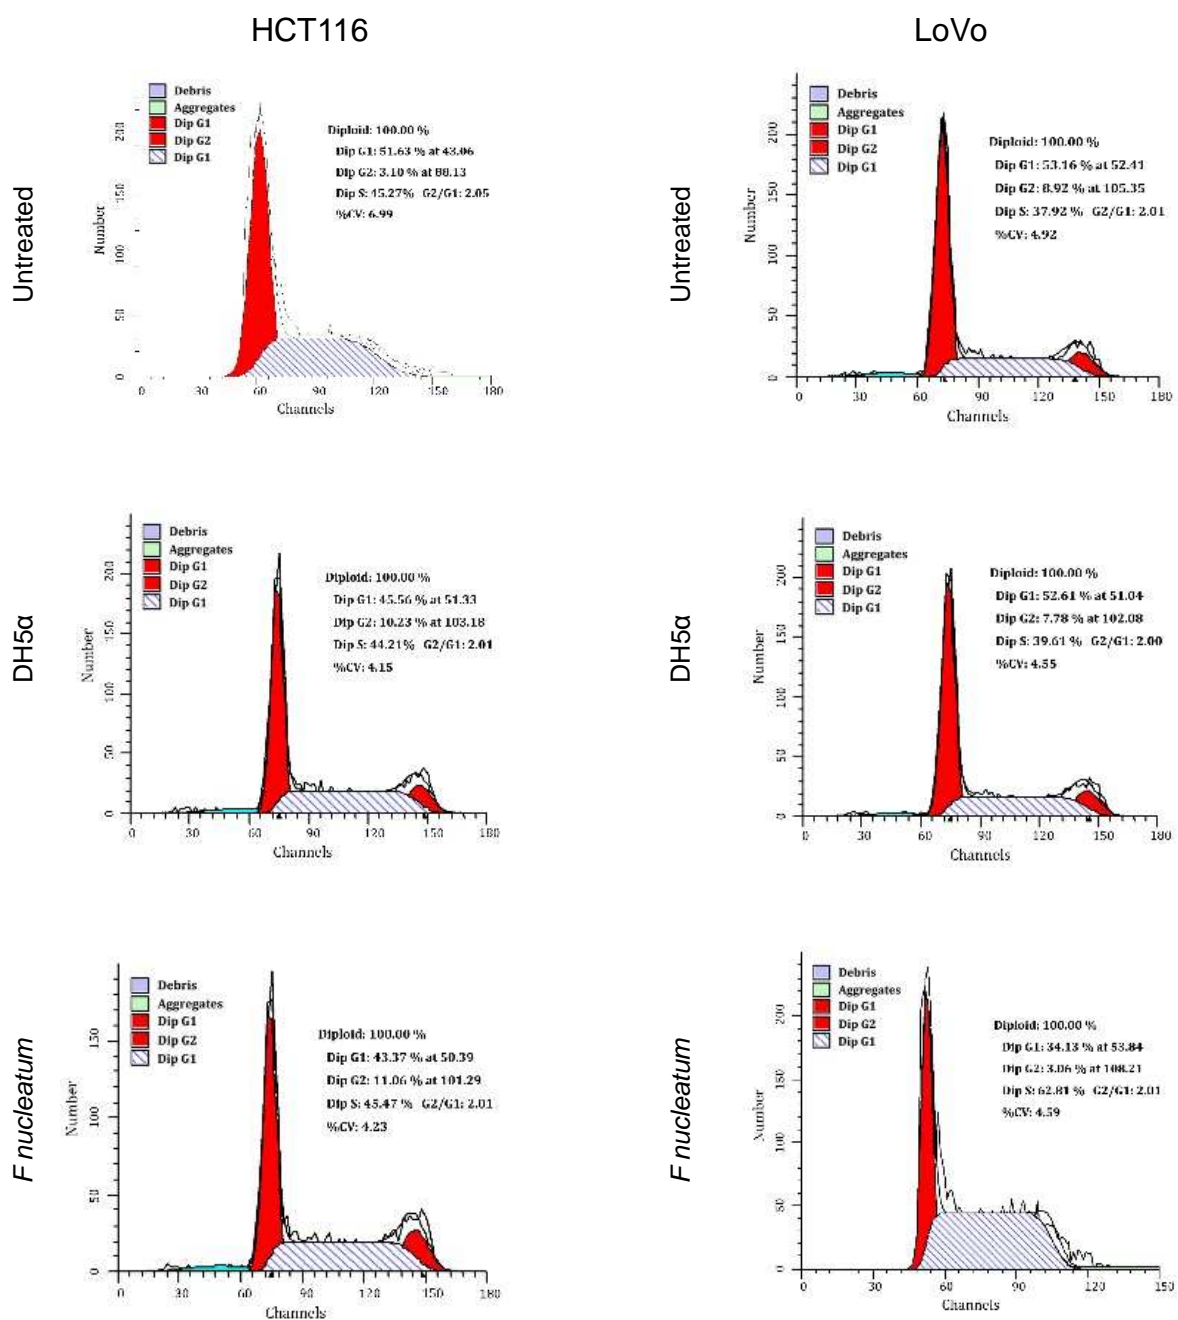

# Supplementary Figure 2

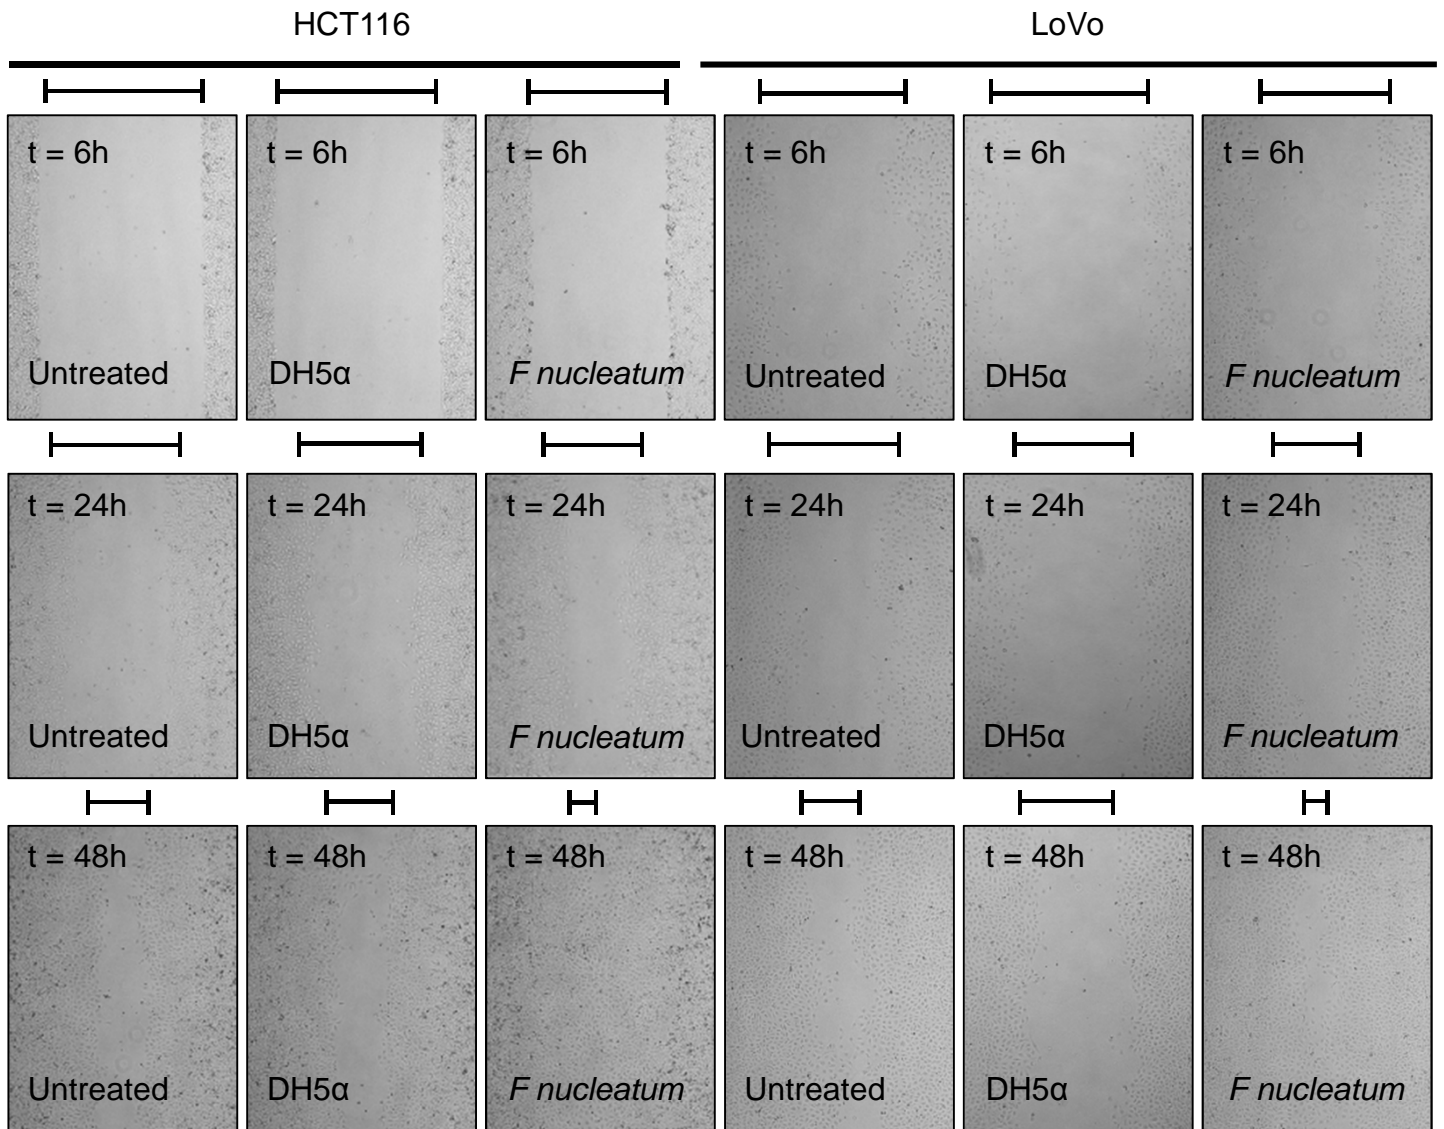



# Supplementary Figure 3

A

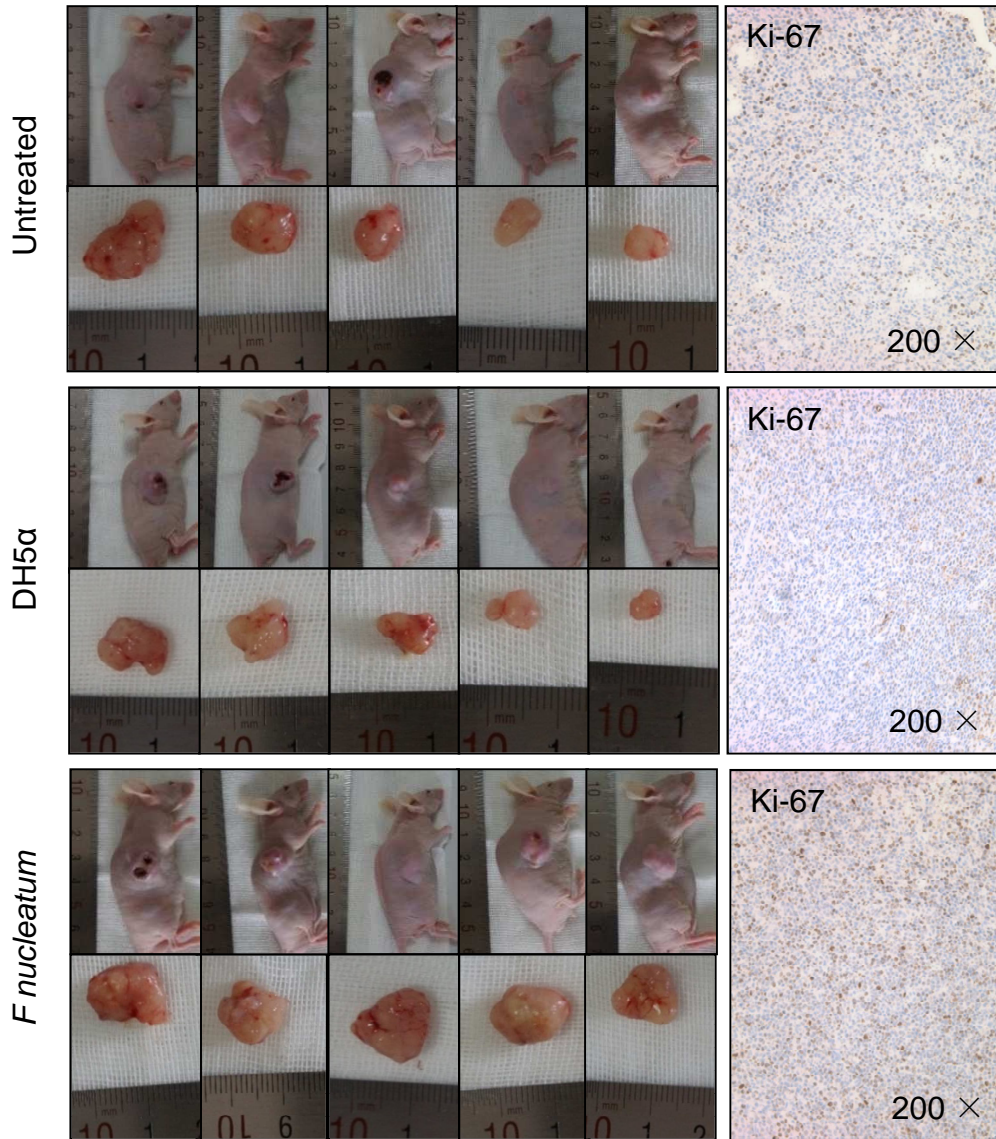

B

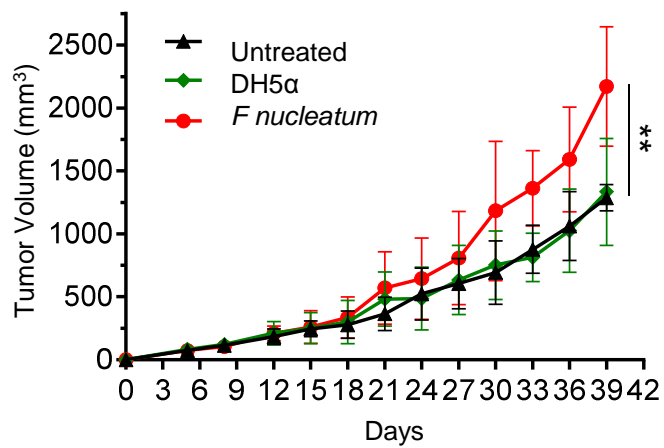

C

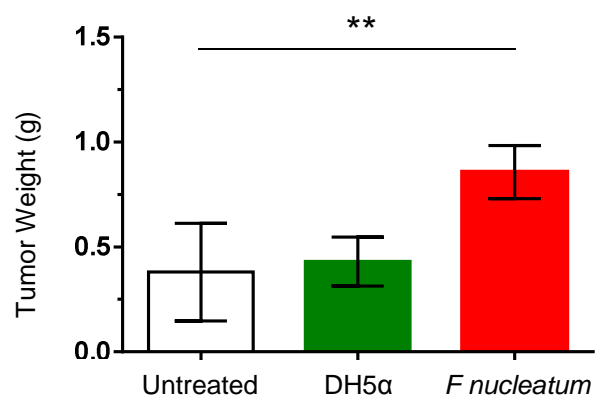

# Supplementary Figure 4

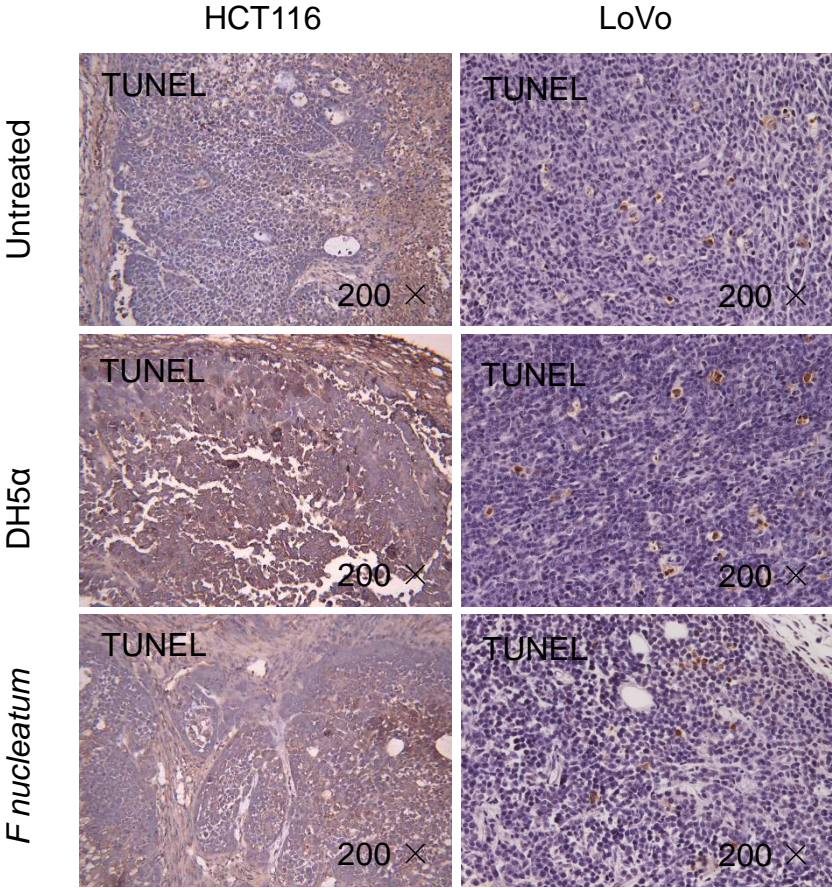



# Supplementary Figure 6

A

HCT116

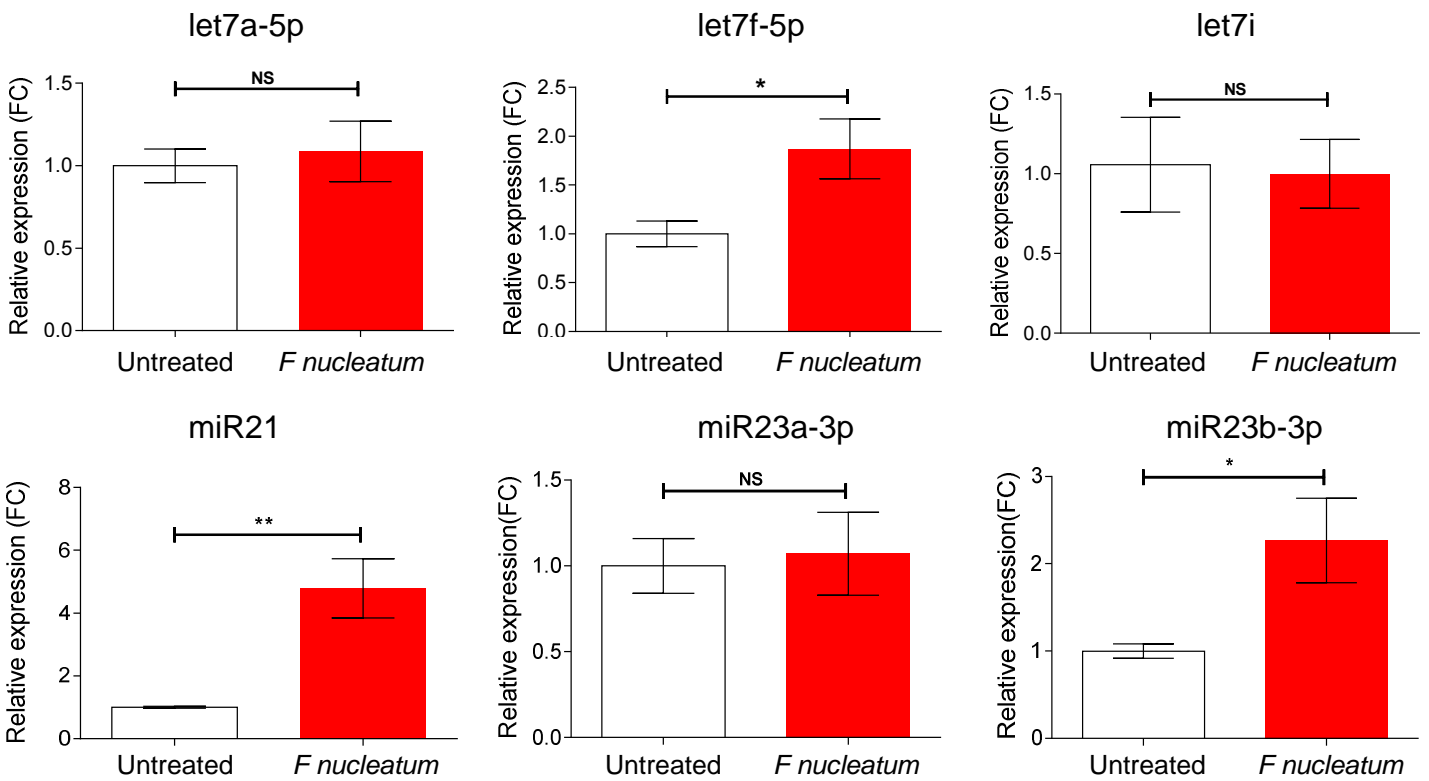

B

LoVo

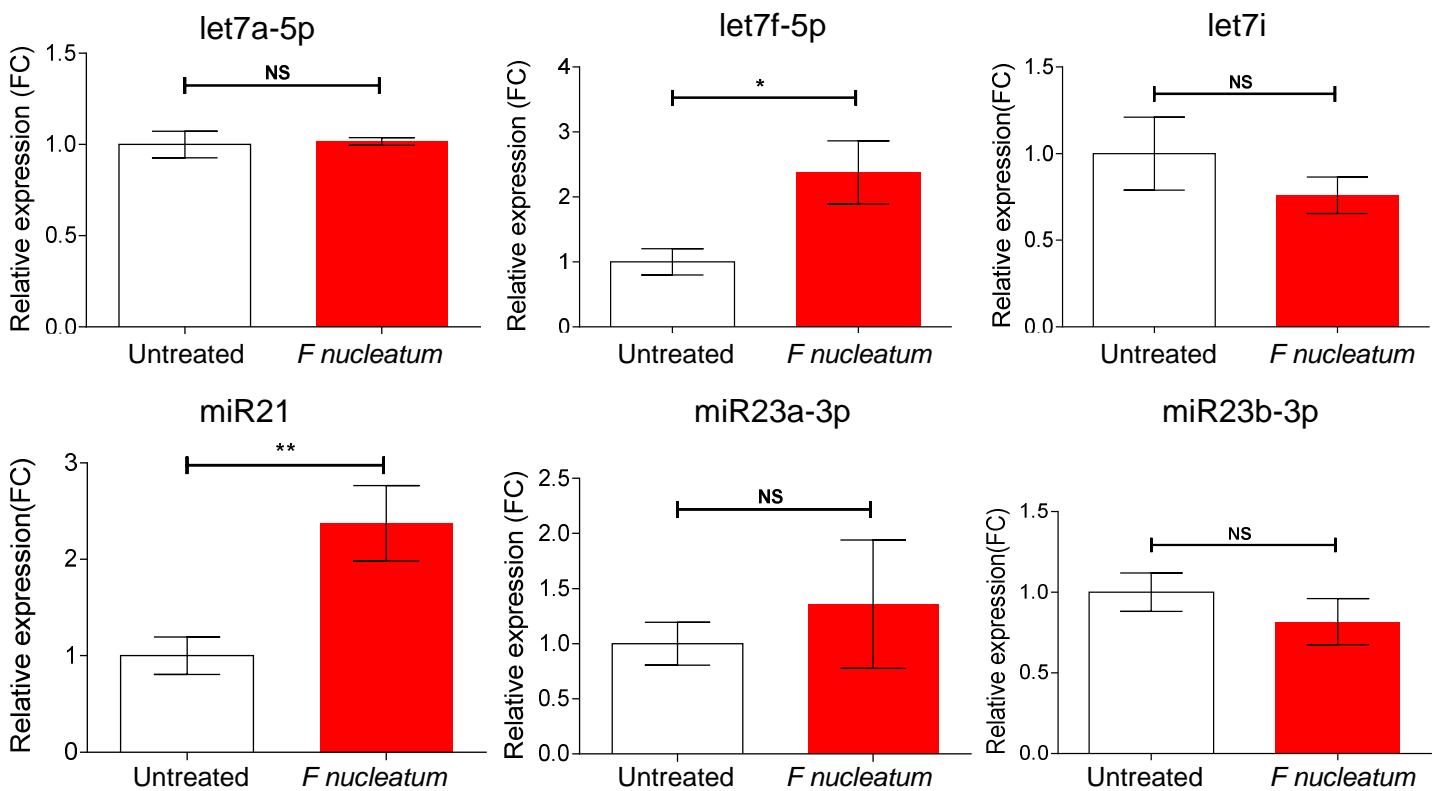



# Supplementary Figure 7

**A**

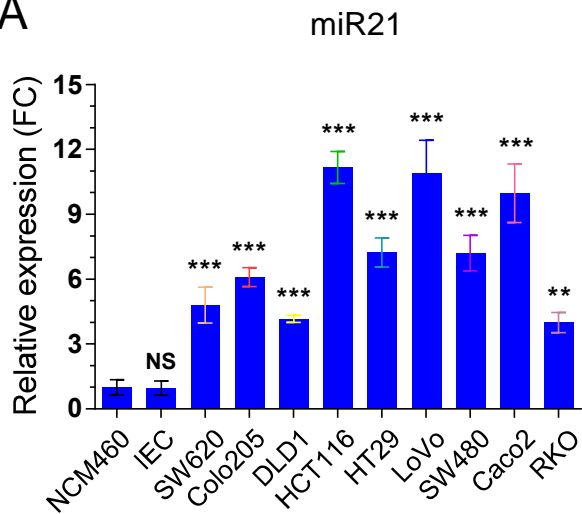

**B**

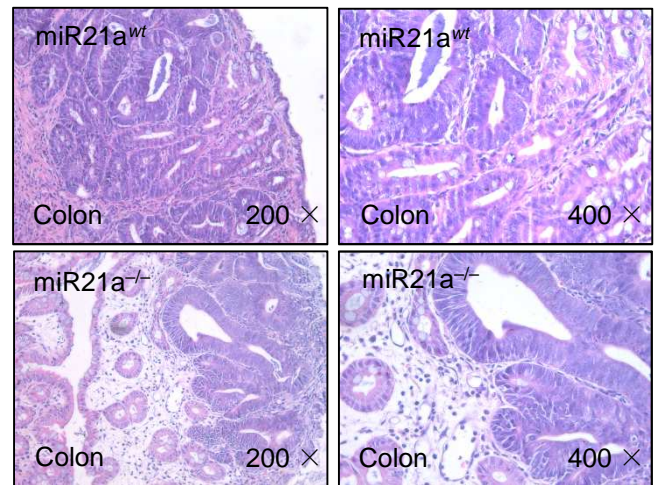

**C**

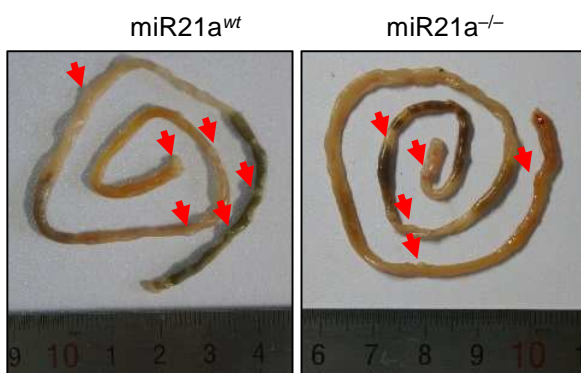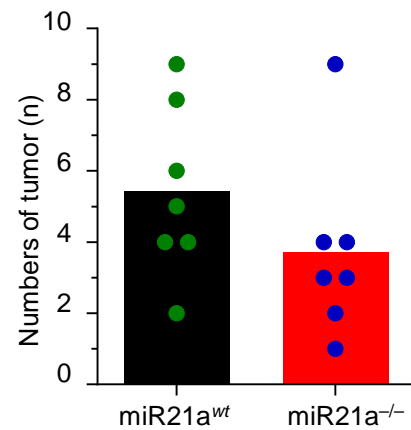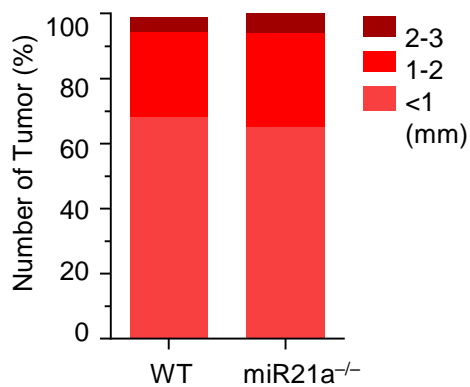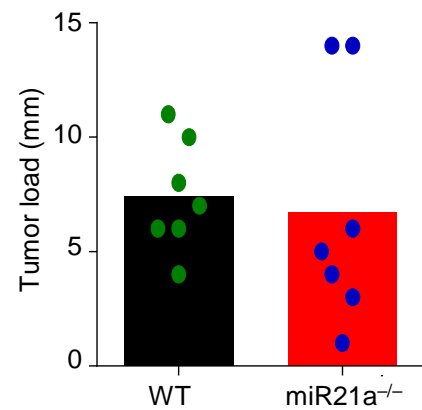

# Supplementary Figure 8

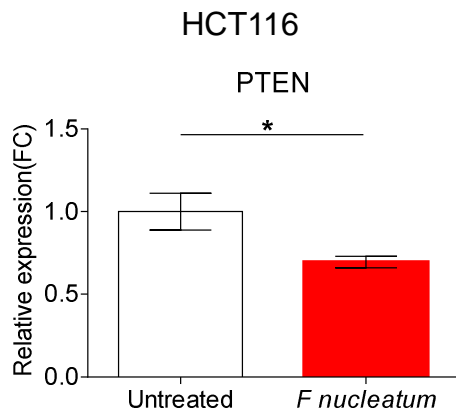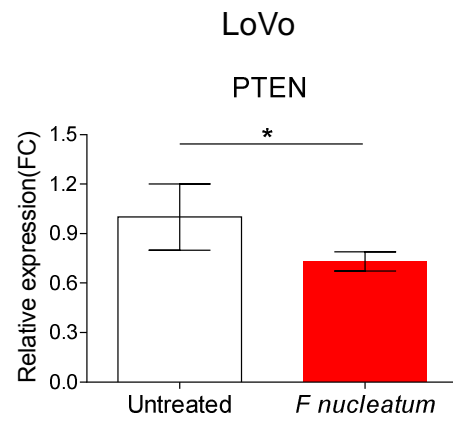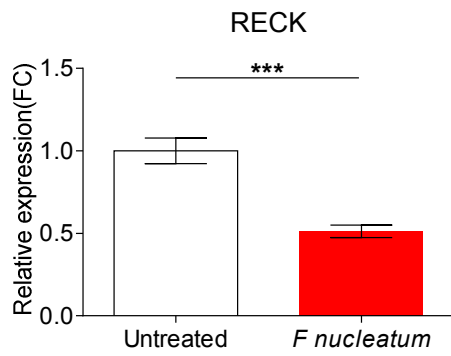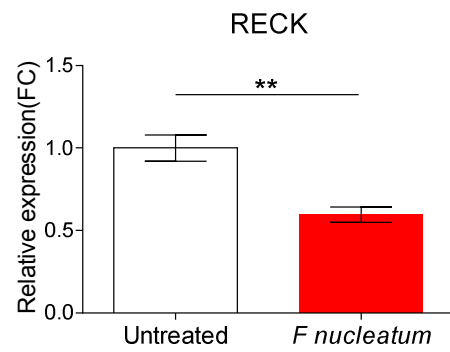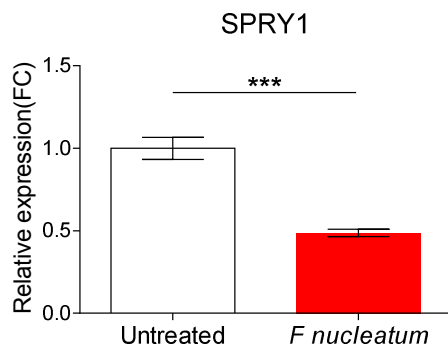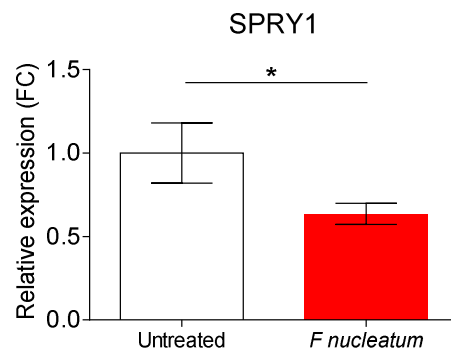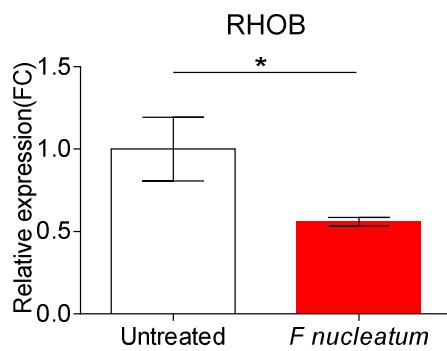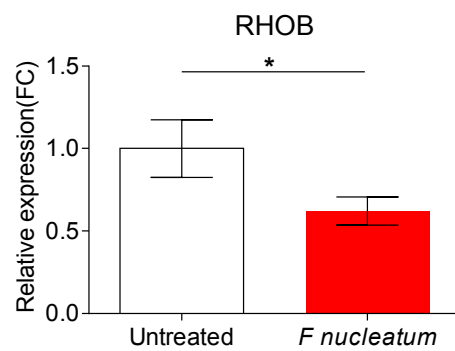

# Supplementary Figure 9

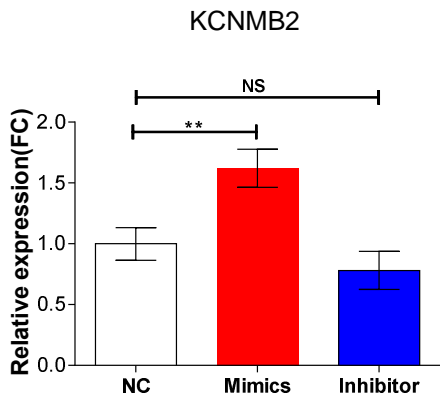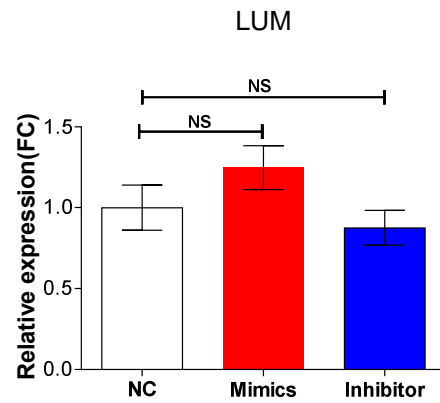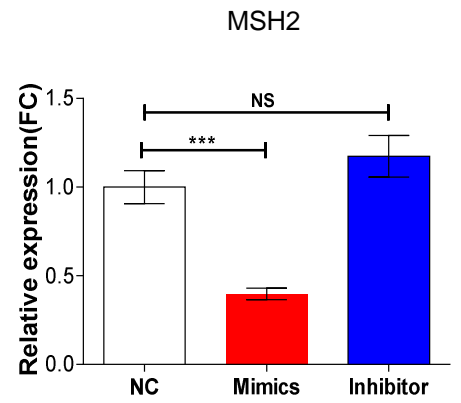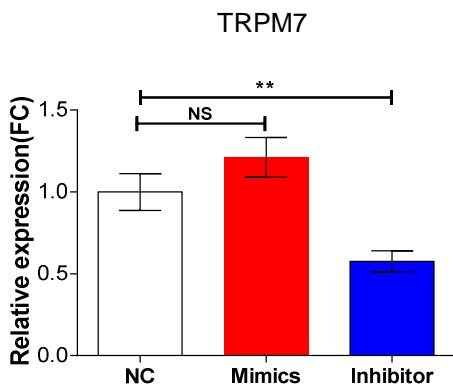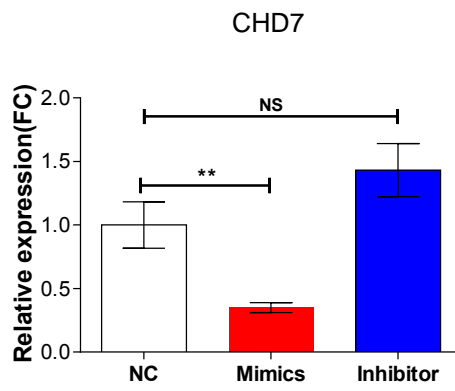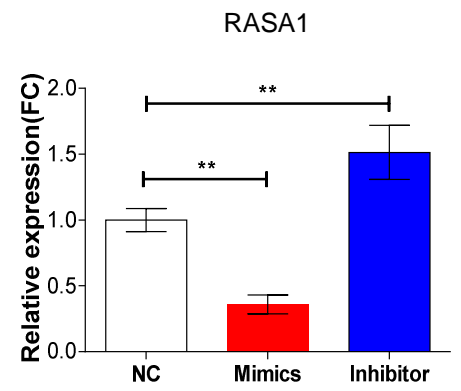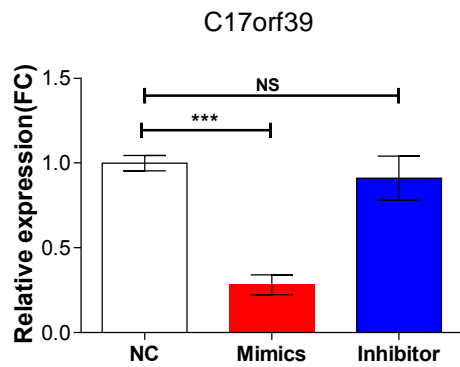

# Supplementary Figure 10

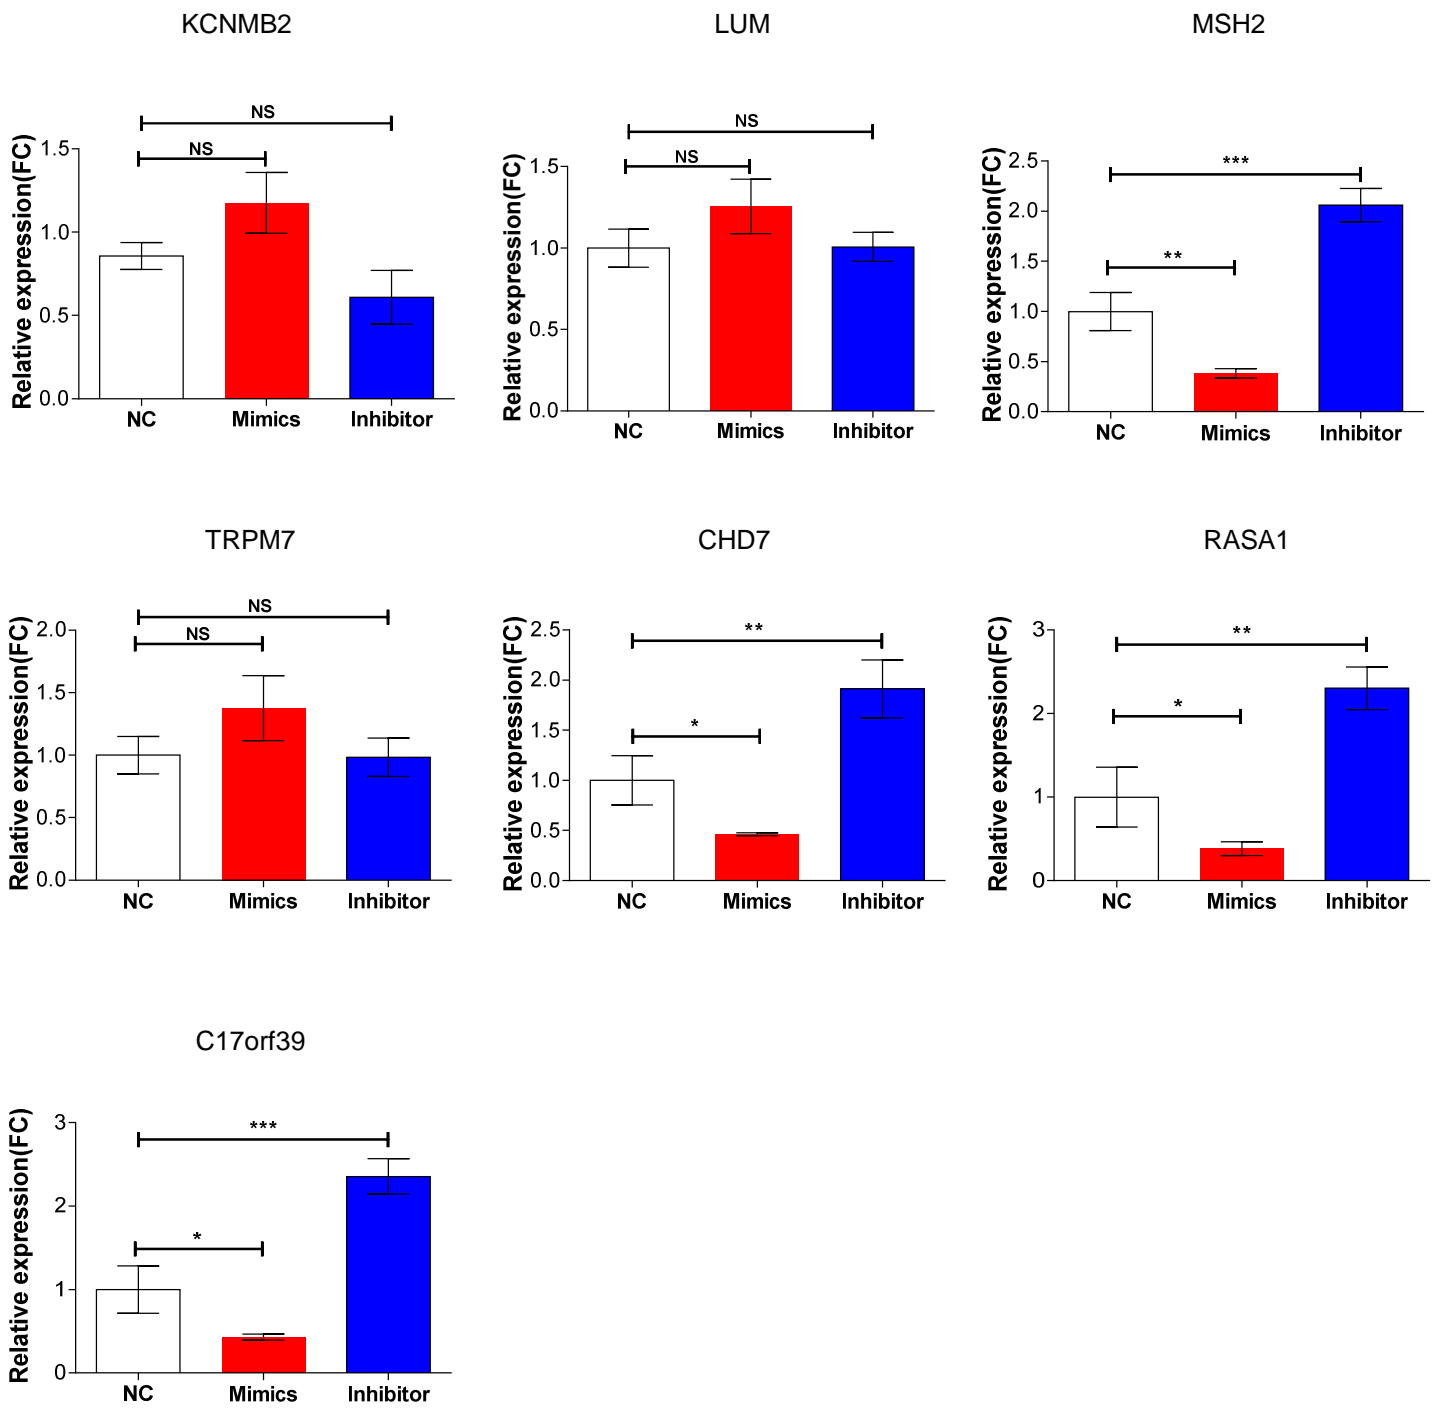



# Supplementary Figure 11

A

Legend:  
□ *F nucleatum*  
■ *F nucleatum*/Lv-NC  
■ *F nucleatum*/Lv-NFκB

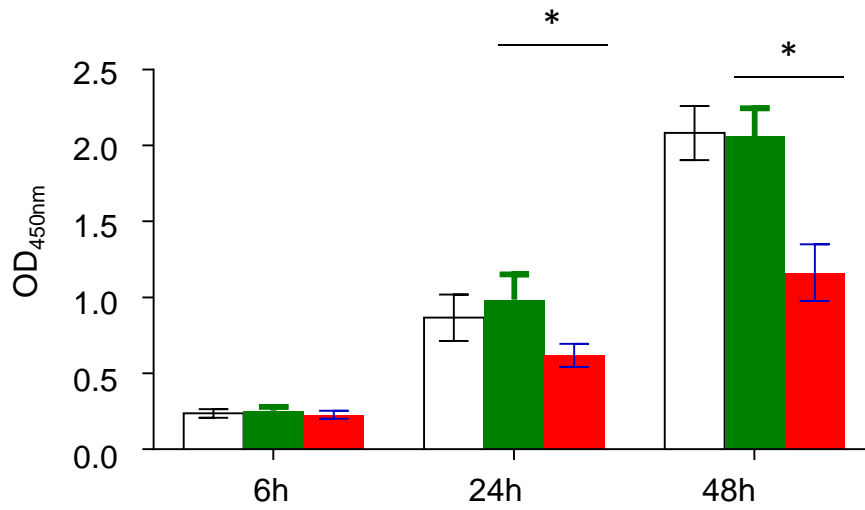

B

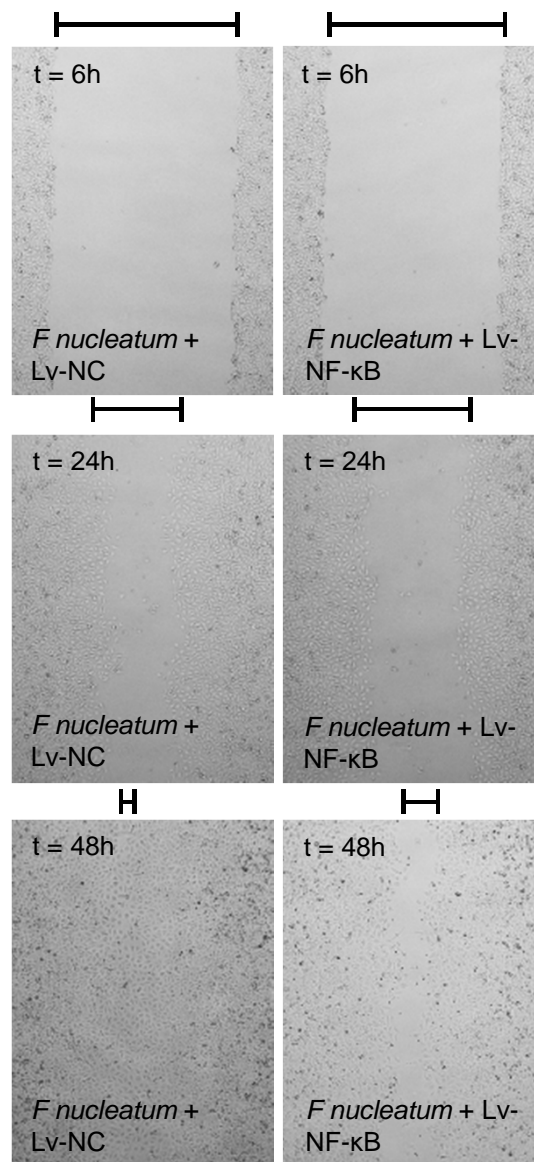

Supplement: NIHMS831219-supplement-supplement_1.pdf [file NIHMS831219-supplement-supplement_1.pdf]
